# Supplementary material for: Using internal strain and mass to modulate Dy⋯Dy coupling and relaxation of magnetization in heterobimetallic metallofullerenes DyM2N@C80and Dy2MN@C80(M = Sc, Y, La, Lu)
Source: Royal Society of Chemistry journal article supplement (doi:10.1039/d2qi02224a), 2022-11-17
Supplement: d2qi02224a1.pdf [file d2qi02224a1.pdf]

**Using internal strain and mass to modulate Dy···Dy coupling and relaxation of magnetization in heterobimetallic metallofullerenes DyM<sub>2</sub>N@C<sub>80</sub> and Dy<sub>2</sub>MN@C<sub>80</sub> (M = Sc, Y, La, Lu)**

Yajuan Hao,<sup>a,b</sup> Georgios Velkos,<sup>a</sup> Sandra Schiemenz,<sup>a</sup> Marco Rosenkranz,<sup>a</sup> Yaofeng Wang,<sup>a</sup> Bernd Büchner,<sup>a</sup> Stanislav M. Avdoshenko,<sup>\*a</sup> Alexey A. Popov,<sup>\*a</sup> Fupin Liu<sup>\*a</sup>

**Supporting Information**

|                                        |     |
|----------------------------------------|-----|
| Experimental details                   | S2  |
| Spectroscopic properties               | S3  |
| Additional X-ray diffraction data      | S5  |
| Computational results                  | S11 |
| Additional data on magnetic properties | S16 |
| Magnetization relaxation times         | S20 |
| Photoluminescence measurements         | S26 |
| References                             | S28 |

## Experimental details

**X-ray diffraction.** Single crystal X-ray diffraction data collection was carried out at 100 K at the BESSY storage ring (BL14.2, Berlin-Adlershof, Germany).<sup>1</sup> XDSAPP2.0 suite was employed for data processing.<sup>2,3</sup> The structure was solved by direct methods and refined by SHELXL-2018.<sup>4</sup> Hydrogen atoms were added geometrically and refined with a riding model.

**Mass spectrometry:** Laser desorption/ionization time-of-flight (LDI-TOF) mass-spectra were measured with a Bruker autoflex mass-spectrometer.

**UV-Vis spectrometry:** UV-vis-NIR absorption spectra were measured in toluene solution at room temperature with Shimadzu 3100 spectrophotometer.

**IR spectrometry:** IR spectra were measured in transmission mode using Hyperion FTIR microscope attached to Vertex 80 FTIR spectrometer (Bruker). Samples were drop-casted on KBr single-crystalline substrate and dried under vacuum.

**Magnetic measurements.** DC and AC magnetic measurements of powder samples were performed using a Quantum Design VSM MPMS3 magnetometer. Magnetic simulations and fitting were performed using PHI code.<sup>5</sup>

**DFT computation.** DFT optimization of  $M_3N@C_{80}$  molecules was performed in Ref. <sup>6</sup> at the PBE-D/PAW level using the VASP code and recommended pseudopotentials with f-shell in-core treatment.<sup>7-11</sup>

**CASSCF calculations.** *Ab initio* energies and wave functions of  $Dy^{3+}$  LF multiplets in  $M_3N@C_{80}$  molecules have been calculated at the CASSCF/SO-RASSI level of theory using the quantum chemistry package OpenMOLCAS.<sup>12</sup> The single ion LF-parameters were calculated based on *ab initio* data with the use of SINGLE\_ANISO module.<sup>13</sup>

### Spectroscopic characterization

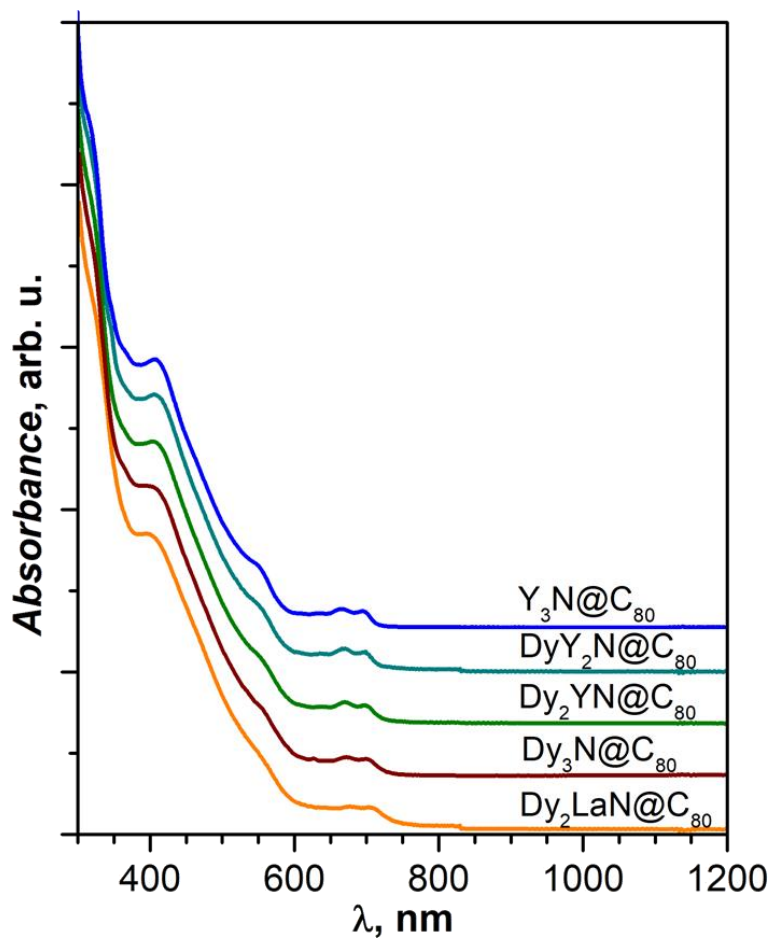

**Figure S1.** UV-Vis-NIR absorption spectra of Dy<sub>x</sub>Y<sub>3-x</sub>N@I<sub>h</sub>-C<sub>80</sub> ( $x = 0-3$ ) and Dy<sub>2</sub>LaN@I<sub>h</sub>-C<sub>80</sub> in toluene solution.

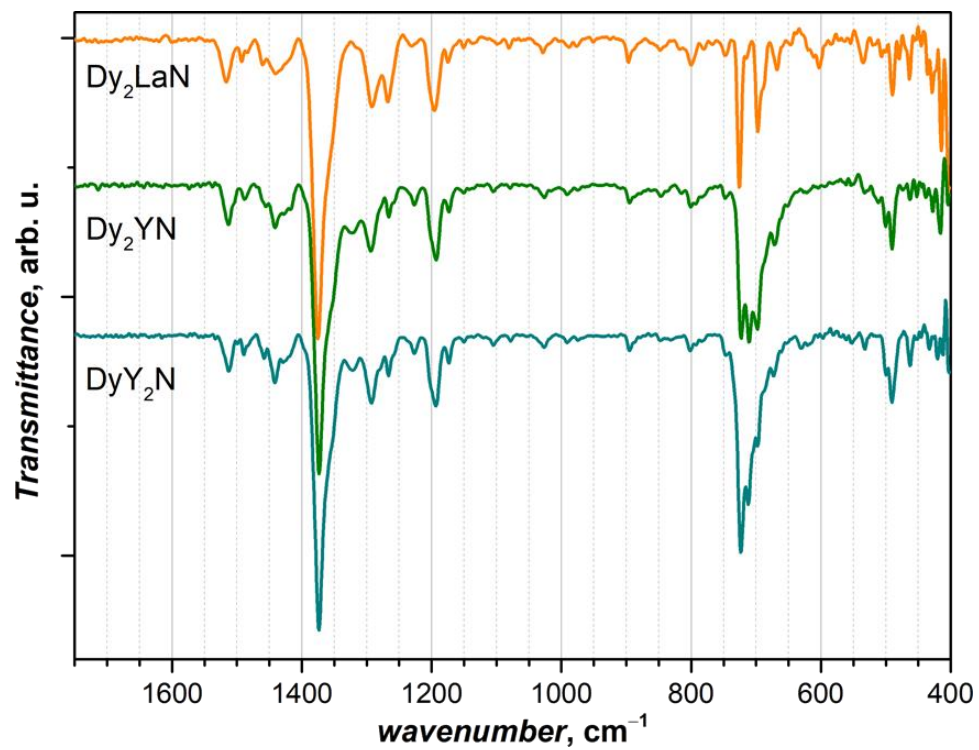

**Figure S2.** FT-IR absorption spectra of Dy<sub>2</sub>LaN@I<sub>h</sub>-C<sub>80</sub>, Dy<sub>2</sub>YN@I<sub>h</sub>-C<sub>80</sub>, and DyY<sub>2</sub>N@I<sub>h</sub>-C<sub>80</sub>.

**Table S1. Crystal data for Dy<sub>x</sub>Y<sub>3-x</sub>N@C<sub>80</sub>**

| Crystal                                             | Dy <sub>3</sub> N@C <sub>80</sub> · NiOEP · 2(C <sub>6</sub> H <sub>6</sub> ) | Dy <sub>2</sub> YN@C <sub>80</sub> · NiOEP · 2(C <sub>6</sub> H <sub>6</sub> ) |
|-----------------------------------------------------|-------------------------------------------------------------------------------|--------------------------------------------------------------------------------|
| Formula                                             | C <sub>128</sub> H <sub>56</sub> Dy <sub>3</sub> N <sub>5</sub> Ni            | C <sub>128</sub> H <sub>56</sub> Dy <sub>2.37</sub> N <sub>5</sub> Ni          |
| Formula weight                                      | 2209.98                                                                       | 2107.61                                                                        |
| Color, habit                                        | Black, block                                                                  | Black, block                                                                   |
| Crystal system                                      | monoclinic                                                                    | triclinic                                                                      |
| Space group                                         | <i>C</i> 2/ <i>c</i>                                                          | <i>P</i> $\bar{1}$                                                             |
| <i>a</i> , Å                                        | 25.260(5)                                                                     | 14.680(3)                                                                      |
| <i>b</i> , Å                                        | 15.050(3)                                                                     | 15.420(3)                                                                      |
| <i>c</i> , Å                                        | 39.490(8)                                                                     | 17.700(4)                                                                      |
| $\alpha$ , deg                                      | 90                                                                            | 81.15(3)                                                                       |
| $\beta$ , deg                                       | 95.39(3)                                                                      | 74.44(3)                                                                       |
| $\gamma$ , deg                                      | 90                                                                            | 86.41(3)                                                                       |
| Volume, Å <sup>3</sup>                              | 14946(5)                                                                      | 3812.9(15)                                                                     |
| Z                                                   | 8                                                                             | 2                                                                              |
| T, K                                                | 100                                                                           | 100                                                                            |
| Radiation ( $\lambda$ , Å)                          | Synchrotron Radiation (0.77977)                                               | Synchrotron Radiation (0.77977)                                                |
| Unique data ( <i>R</i> <sub>int</sub> )             | 23501 (0.0806)                                                                | 22329 (0.0749)                                                                 |
| Parameters                                          | 1299                                                                          | 1325                                                                           |
| Restraints                                          | 19                                                                            | 864                                                                            |
| Observed data ( <i>I</i> > 2 $\sigma$ ( <i>I</i> )) | 22966                                                                         | 20633                                                                          |
| Goodness-of-fit on F <sup>2</sup>                   | 1.029                                                                         | 1.036                                                                          |
| $\rho_{\text{calc}}$ , g/cm <sup>3</sup>            | 1.964                                                                         | 1.836                                                                          |
| <i>R</i> <sub>1</sub> <sup>a</sup> (observed data)  | 0.0537                                                                        | 0.0884                                                                         |
| <i>wR</i> <sub>2</sub> <sup>b</sup> (all data)      | 0.1489                                                                        | 0.2455                                                                         |
| CCDC NO.                                            | 2184669                                                                       | 2184670                                                                        |

<sup>a</sup>For data with *I* > 2 $\sigma$ (*I*),  $R_1 = \frac{\sum||F_o| - |F_c||}{\sum|F_o|}$ . <sup>b</sup>For all data,  $wR_2 = \sqrt{\frac{\sum[w(F_o^2 - F_c^2)^2]}{\sum[w(F_o^2)^2]}}$ .

Table S1 (continued). Crystal data for Dy<sub>x</sub>Y<sub>3-x</sub>N@C<sub>80</sub>

| Crystal                                            | DyY <sub>2</sub> N@C <sub>80</sub> · NiOEP · 2(C <sub>6</sub> H <sub>6</sub> ) | Y <sub>3</sub> N@C <sub>80</sub> · NiOEP · 2(C <sub>6</sub> H <sub>6</sub> ) |
|----------------------------------------------------|--------------------------------------------------------------------------------|------------------------------------------------------------------------------|
| Formula                                            | C <sub>128</sub> H <sub>56</sub> Dy <sub>1.95</sub> N <sub>5</sub> Ni          | C <sub>128</sub> H <sub>56</sub> N <sub>5</sub> NiY <sub>3</sub>             |
| Formula weight                                     | 2039.16                                                                        | 1989.21                                                                      |
| Color, habit                                       | Black, block                                                                   | Black, block                                                                 |
| Crystal system                                     | monoclinic                                                                     | monoclinic                                                                   |
| Space group                                        | <i>C2/c</i>                                                                    | <i>C2/c</i>                                                                  |
| <i>a</i> , Å                                       | 25.290(5)                                                                      | 25.270(5)                                                                    |
| <i>b</i> , Å                                       | 15.060(3)                                                                      | 15.070(3)                                                                    |
| <i>c</i> , Å                                       | 39.420(8)                                                                      | 39.470(8)                                                                    |
| <i>α</i> , deg                                     | 90                                                                             | 90                                                                           |
| <i>β</i> , deg                                     | 95.28(3)                                                                       | 95.22(3)                                                                     |
| <i>γ</i> , deg                                     | 90                                                                             | 90                                                                           |
| Volume, Å <sup>3</sup>                             | 14950(5)                                                                       | 14969(5)                                                                     |
| <i>Z</i>                                           | 8                                                                              | 8                                                                            |
| <i>T</i> , K                                       | 100                                                                            | 100                                                                          |
| Radiation (λ, Å)                                   | Synchrotron Radiation (0.77977)                                                | Synchrotron Radiation (0.77977)                                              |
| Unique data ( <i>R</i> <sub>int</sub> )            | 24172 (0.1136)                                                                 | 25477 (0.0630)                                                               |
| Parameters                                         | 1275                                                                           | 1272                                                                         |
| Restraints                                         | 24                                                                             | 18                                                                           |
| Observed data ( <i>I</i> > 2σ( <i>I</i> ))         | 22939                                                                          | 18407                                                                        |
| Goodness-of-fit on <i>F</i> <sup>2</sup>           | 1.051                                                                          | 1.041                                                                        |
| ρ <sub>calc</sub> , g/cm <sup>3</sup>              | 1.812                                                                          | 1.765                                                                        |
| <i>R</i> <sub>1</sub> <sup>a</sup> (observed data) | 0.0563                                                                         | 0.0753                                                                       |
| <i>wR</i> <sub>2</sub> <sup>b</sup> (all data)     | 0.1577                                                                         | 0.2285                                                                       |
| CCDC NO.                                           | 2184671                                                                        | 2184672                                                                      |

<sup>a</sup>For data with *I* > 2σ(*I*),  $R_1 = \frac{\sum ||F_o| - |F_c||}{\sum |F_o|}$ . <sup>b</sup>For all data,  $wR_2 = \sqrt{\frac{\sum [w(F_o^2 - F_c^2)^2]}{\sum [w(F_o^2)^2]}}$ .

**Table S2. Crystal data for Dy<sub>2</sub>LaN@C<sub>80</sub>.**

| Crystal                                            | LaDy <sub>2</sub> N@C <sub>80</sub> · NiOEP · 2C <sub>6</sub> H <sub>6</sub> |
|----------------------------------------------------|------------------------------------------------------------------------------|
| Formula                                            | C <sub>128</sub> H <sub>56</sub> Dy <sub>2.45</sub> N <sub>5</sub> Ni        |
| Formula weight                                     | 2121.22                                                                      |
| Color, habit                                       | Black, block                                                                 |
| Crystal system                                     | monoclinic                                                                   |
| Space group                                        | C2/c                                                                         |
| <i>a</i> , Å                                       | 25.270(5)                                                                    |
| <i>b</i> , Å                                       | 15.080(3)                                                                    |
| <i>c</i> , Å                                       | 39.460(8)                                                                    |
| <i>α</i> , deg                                     | 90                                                                           |
| <i>β</i> , deg                                     | 95.31(3)                                                                     |
| <i>γ</i> , deg                                     | 90                                                                           |
| Volume, Å <sup>3</sup>                             | 14973(5)                                                                     |
| <i>Z</i>                                           | 8                                                                            |
| <i>T</i> , K                                       | 100                                                                          |
| Radiation (λ, Å)                                   | Synchrotron Radiation (0.77977)                                              |
| Unique data ( <i>R</i> <sub>int</sub> )            | 22315 (0.0477)                                                               |
| Parameters                                         | 2066                                                                         |
| Restraints                                         | 2172                                                                         |
| Observed data ( <i>I</i> > 2σ( <i>I</i> ))         | 17085                                                                        |
| Goodness-of-fit on F <sup>2</sup>                  | 1.025                                                                        |
| ρ <sub>calc</sub> , g/cm <sup>3</sup>              | 1.882                                                                        |
| <i>R</i> <sub>1</sub> <sup>a</sup> (observed data) | 0.0486                                                                       |
| <i>wR</i> <sub>2</sub> <sup>b</sup> (all data)     | 0.1557                                                                       |
| CCDC NO.                                           | 2184673                                                                      |

<sup>a</sup>For data with *I* > 2σ(*I*),  $R_1 = \frac{\sum ||F_o| - |F_c||}{\sum |F_o|}$ . <sup>b</sup>For all data,  $wR_2 = \sqrt{\frac{\sum [w(F_o^2 - F_c^2)^2]}{\sum [w(F_o^2)^2]}}$ .

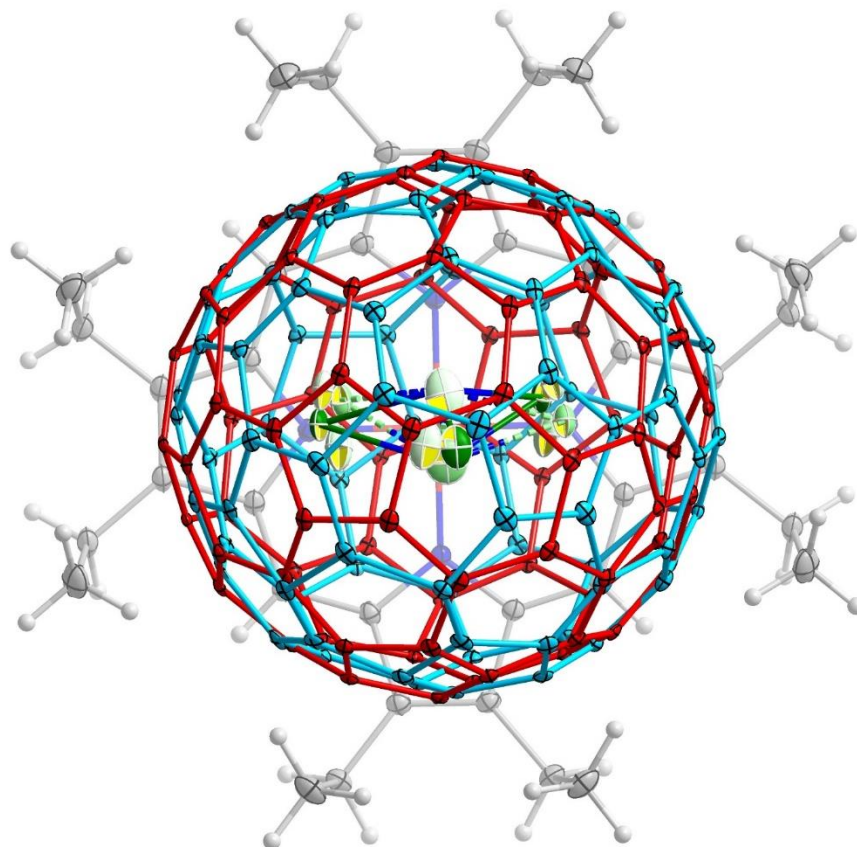

**Figure S3.** Single-crystal X-ray structures of  $\text{LaDy}_2\text{N}@C_{80}\cdot\text{NiOEP}\cdot 2C_6H_6$ . To show the relation between two  $C_{80}$  orientations, the structure is viewed perpendicular to the NiOEP. The displacement parameters are shown at the 30% probability except for those of cage carbons, which are shown at the 5% probability to highlight the orientations. Colour code: grey for carbon, blue for nitrogen, white for hydrogen, red for nickel, and green for dysprosium.



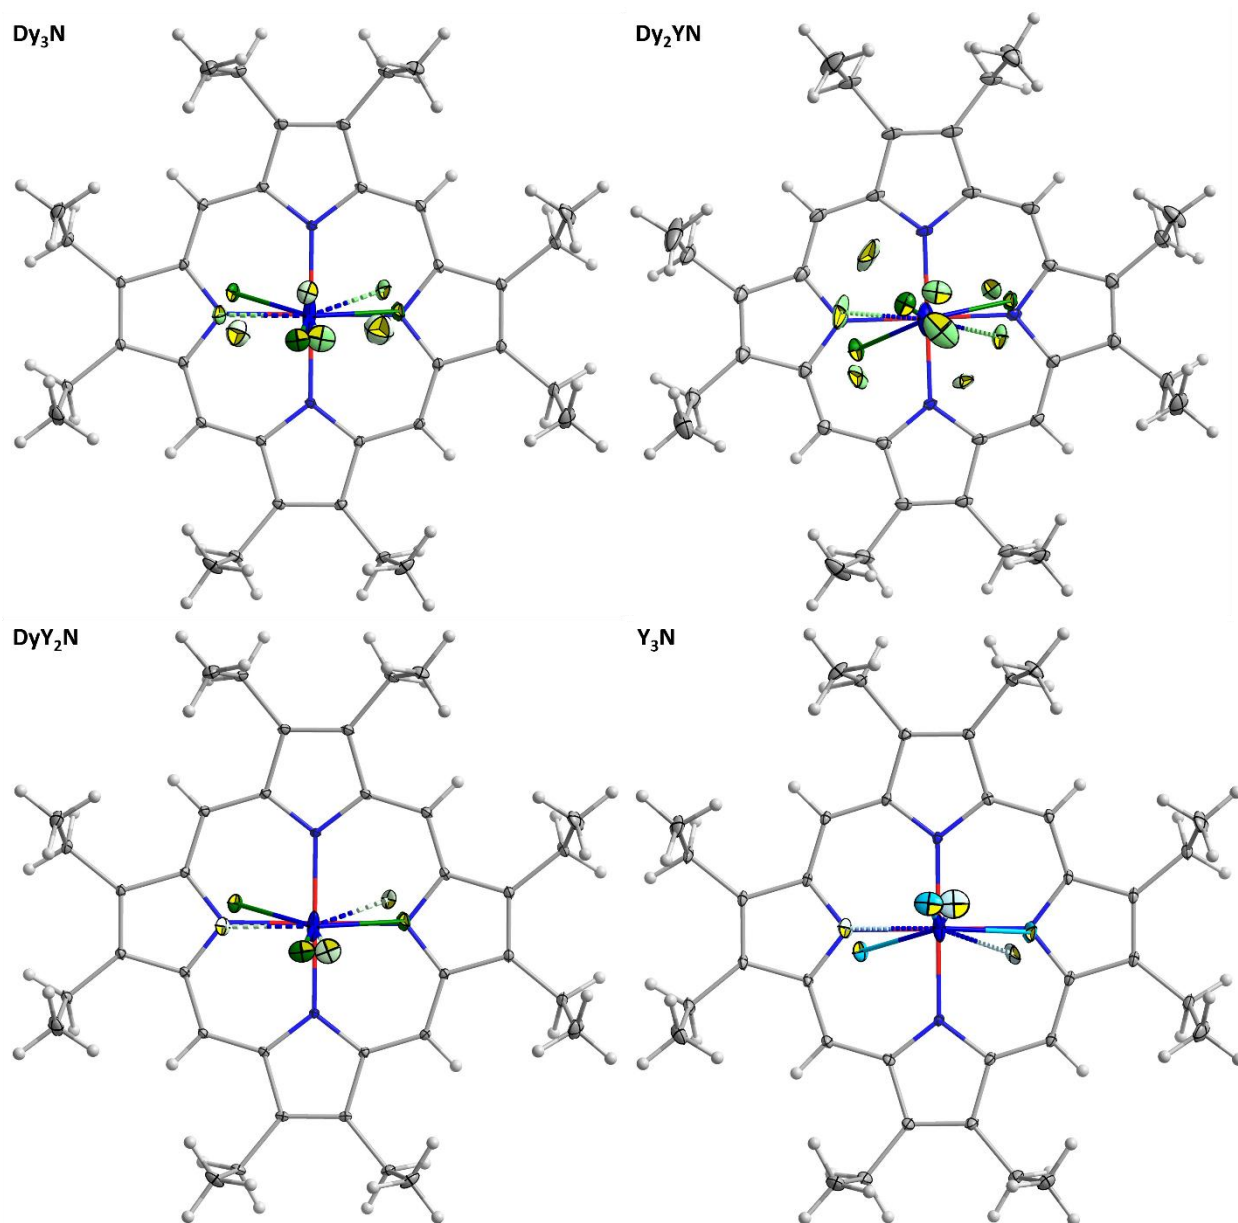

**Figure S4.** Orientation of endohedral  $M_3N$  ( $M_3N = Dy_3N, Dy_2YN, DyY_2N,$  and  $Y_3N$ ) clusters with respect to NiOEP of  $M_3N@C_{80}$ -NiOEP single crystals. Fullerene cage and the solvent molecules are omitted for clarity. The displacement parameters are shown at the 30% probability. Color code: grey for carbon, blue for nitrogen, white for hydrogen, red for nickel, green for dysprosium, and cyan for yttrium.

**Table S3.** M<sub>3</sub>N@I<sub>h</sub>-C<sub>80</sub>-NiOEP (CoOEP) co-crystals.

| M <sub>3</sub> N, solvent                                                                    | space group     | cage sites         | M sites <sup>a</sup>                                   | N sites   | N out of plane <sup>b</sup> | ref |
|----------------------------------------------------------------------------------------------|-----------------|--------------------|--------------------------------------------------------|-----------|-----------------------------|-----|
| Sc <sub>3</sub> N, 1.5 CHCl <sub>3</sub> /<br>0.5 C <sub>6</sub> H <sub>6</sub>              | C2/m, 4         | 1                  | 0.75/0.25                                              | 1         | planar                      | 14  |
| Sc <sub>3</sub> N, 2 C <sub>6</sub> H <sub>6</sub>                                           | P $\bar{1}$ , 2 | 1                  | 13 Sc: 0.48 etc                                        | 1         |                             | 15  |
| Y <sub>3</sub> N, 2 C <sub>6</sub> H <sub>6</sub>                                            | C2/c, 8         | 1                  | 0.85/0.15                                              | 1         | planar                      | tw  |
| Gd <sub>3</sub> N, 1.5 C <sub>6</sub> H <sub>6</sub>                                         | C2/m, 4         | 0.5/0.5            | 0.41/0.04/0.02/<br>0.02 (out of 0.5)                   | 0.62/0.38 | 0.522(8)/0.46(2)            | 16  |
| Tb <sub>3</sub> N, 2 C <sub>6</sub> H <sub>6</sub>                                           | C2/c, 8         | 1                  | 0.97/0.03                                              | 0.60/0.40 | 0.453(4)/0.405(7)           | 17  |
| Dy <sub>3</sub> N, 2 C <sub>6</sub> H <sub>6</sub>                                           | C2/c, 8         | 1                  | 0.66/0.31/0.03                                         | 1         | 0.07(2) (planar)            | 18  |
|                                                                                              | C2/c, 8         | 1                  | 0.80/0.18/0.02                                         | 1         | 0.018(6) (planar)           | tw  |
| Ho <sub>3</sub> N, 2 C <sub>6</sub> H <sub>6</sub>                                           | C2/c, 8         | 1                  | 0.84/0.16                                              | 1         | 0.058(9) (planar)           | 19  |
| Er <sub>3</sub> N, 2 C <sub>6</sub> H <sub>6</sub>                                           | C2/c, 8         | 1                  | 0.77/0.23                                              | 1         | 0.025(3) (planar)           | 19  |
|                                                                                              | C2/m, 4         | 1                  | 33 Er: 0.24 etc                                        | 1         | 0.049(4) (planar)           | 20  |
| Tm <sub>3</sub> N, 2 C <sub>6</sub> H <sub>6</sub>                                           | C2/c, 8         | 1                  | 0.67/0.33                                              | 1         | planar                      | 21  |
| Lu <sub>3</sub> N, 1.x C <sub>6</sub> H <sub>6</sub>                                         | C2/m, 4         | 0.5/0.5            | 14 Lu: 0.37 etc                                        | 1         | planar                      | 22  |
| Lu <sub>3</sub> N, 2 C <sub>6</sub> H <sub>6</sub>                                           | P $\bar{1}$ , 2 | 1                  | 0.85/0.15                                              | 1         | planar                      | 23  |
| LaSc <sub>2</sub> N, 2 C <sub>6</sub> H <sub>6</sub>                                         | C2/m, 4         | 0.5/0.5            | Sc 0.5/0.5, La 1                                       | 0.5/0.5   | planar                      | 24  |
| CeSc <sub>2</sub> N, 2 C <sub>6</sub> H <sub>6</sub>                                         | C2/c, 8         | 1                  | 1                                                      | 1         | planar                      | 25  |
| GdSc <sub>2</sub> N, 2 C <sub>6</sub> H <sub>6</sub>                                         | C2/c, 8         | 1                  | 1                                                      | 1         | planar                      | 26  |
| TbSc <sub>2</sub> N, 2 C <sub>6</sub> H <sub>6</sub>                                         | C2/m, 4         | 0.5/0.5            | Tb 0.38/0.07/0.05<br>Sc 0.30/0.10/0.10<br>(out of 0.5) | 1         | planar                      | 26  |
| DySc <sub>2</sub> N, 2 C <sub>6</sub> H <sub>6</sub>                                         | C2/c, 8         | 1                  | Dy 0.95/0.05; Sc 1                                     | 1         | planar                      | 27  |
| DySc <sub>2</sub> N, 0.7<br>C <sub>6</sub> H <sub>6</sub> /1.3 C <sub>7</sub> H <sub>8</sub> | P $\bar{1}$ , 2 | 1                  | 0.82/0.18                                              | 1         | planar                      |     |
| ErSc <sub>2</sub> N, 1.5<br>C <sub>6</sub> H <sub>6</sub> /0.3 CHCl <sub>3</sub>             | C2/m, 4         | 0.5/0.5            | 0.40/0.04/0.04/<br>0.02 (out of 0.5)                   | 1         | planar                      | 28  |
| VSc <sub>2</sub> N, 1.67<br>C <sub>6</sub> H <sub>6</sub> /0.33 CHCl <sub>3</sub>            | C2/m, 4         | 0.42/0.29/<br>0.29 | 0.6/0.4                                                | 1         | planar                      | 29  |
| Gd <sub>2</sub> ScN, 2 C <sub>6</sub> H <sub>6</sub>                                         | I2/a, 8         | 1                  | 0.85/0.15                                              | 1         | planar                      | 26  |
| Dy <sub>2</sub> ScN, 2 C <sub>6</sub> H <sub>6</sub>                                         | P $\bar{1}$ , 2 | 1                  | 0.69/0.31                                              | 1         | planar                      | 30  |
| V <sub>2</sub> ScN, 2 C <sub>6</sub> H <sub>6</sub>                                          | C2/m, 4         | 0.37/0.37/<br>0.26 | Sc: 0.5/0.5<br>V: 0.58/0.42                            | 1         | planar                      | 29  |
| DyGd <sub>2</sub> N, 2 C <sub>6</sub> H <sub>6</sub>                                         | C2/c, 8         | 1                  | Dy: 1;<br>Gd: 0.86/0.14                                | 0.58/0.42 | 0.46(2)/0.45(2)             | 6   |
| DyEr <sub>2</sub> N, 2 C <sub>6</sub> H <sub>6</sub>                                         | C2/c, 8         | 1                  | 0.80/0.20                                              | 1         | planar                      | 6   |
| DyY <sub>2</sub> N, 2 C <sub>6</sub> H <sub>6</sub>                                          | C2/c, 8         | 1                  | 0.59/0.05 (*Dy)                                        | 1         | planar                      | tw  |
| Dy <sub>2</sub> YN, 2 C <sub>6</sub> H <sub>6</sub>                                          | P $\bar{1}$ , 2 | 1                  | 3-4 sites, ~0.4 etc                                    | 1         | planar                      | tw  |
| Dy <sub>2</sub> LaN, 2 C <sub>6</sub> H <sub>6</sub>                                         | C2/c, 8         | 0.61/0.39          | 4 sites, 0.49 etc                                      | 0.70/0.30 | 0.619(4)/0.530(9)           | tw  |
| Ho <sub>2</sub> LuN, 2 C <sub>6</sub> H <sub>6</sub>                                         | P $\bar{1}$ , 2 | 1                  | 0.84/0.16                                              | 1         | planar                      | 23  |
| CeLu <sub>2</sub> N, 2C <sub>7</sub> H <sub>8</sub>                                          | P $\bar{1}$ , 2 | 1                  | 0.65/0.15/0.10/<br>0.06/0.04                           | 0.53/0.47 | 0.349(8)/0.325(8)           | 31  |
| DyErScN, CHCl <sub>3</sub>                                                                   | C2/m, 4         | 0.5/0.5            | heavily<br>disordered                                  | 1         | planar                      | 32  |

Notes: <sup>a</sup> when metals are strongly disordered, the number of metal sites is given and the highest site occupancy otherwise only site occupancies of all metal sites are listed; <sup>b</sup> calculated based on the three main metal sites.

**Ab initio calculated ligand-field splitting**

**Table S4a.** Ligand-field splitting for Dy<sup>3+</sup> ion in DySc<sub>2</sub>N@C<sub>80</sub> computed at the CASSCF/RASSI level

|     | $E, \text{cm}^{-1}$ | % composition in $ m_j\rangle$ basis <sup>a</sup> | g-tensor:   |             |              |
|-----|---------------------|---------------------------------------------------|-------------|-------------|--------------|
|     |                     |                                                   | $g_x$       | $g_y$       | $g_z$        |
| KD1 | 0.0                 | 99.7 $ \pm 15/2\rangle$                           | 0.000048797 | 0.000057979 | 19.838679692 |
| KD2 | 355.8               | 97.0 $ \pm 13/2\rangle$                           | 0.001188899 | 0.001456091 | 17.169678599 |
| KD3 | 665.7               | 89.7 $ \pm 11/2\rangle$ , 6.9 $ \pm 9/2\rangle$   | 0.068510080 | 0.082782792 | 14.280293169 |
| KD4 | 905.9               | 80.6 $ \pm 9/2\rangle$ , 7.6 $ \pm 7/2\rangle$    | 0.709112734 | 0.891167392 | 11.273598377 |
| KD5 | 1049.9              | 68.3 $ \pm 7/2\rangle$ , 17.2 $ \pm 3/2\rangle$   | 3.732065167 | 4.194752622 | 8.089534531  |
| KD6 | 1140.3              | 55.9 $ \pm 5/2\rangle$ , 19.8 $ \pm 1/2\rangle$   | 2.229762052 | 3.791906956 | 10.287340198 |
| KD7 | 1221.9              | 41.1 $ \pm 3/2\rangle$ , 23.6 $ \pm 1/2\rangle$   | 1.167464358 | 1.619568336 | 14.784206957 |
| KD8 | 1283.6              | 50.4 $ \pm 1/2\rangle$ , 35.5 $ \pm 3/2\rangle$   | 0.390457677 | 1.275118627 | 18.313313804 |

<sup>a</sup> only two largest contributions exceeding 5% are listed

**Table S4b.** Ligand-field splitting for Dy<sup>3+</sup> ion in DyLu<sub>2</sub>N@C<sub>80</sub> computed at the CASSCF/RASSI level

|     | $E, \text{cm}^{-1}$ | % composition in $ m_j\rangle$ basis <sup>a</sup> | g-tensor:   |             |              |
|-----|---------------------|---------------------------------------------------|-------------|-------------|--------------|
|     |                     |                                                   | $g_x$       | $g_y$       | $g_z$        |
| KD1 | 0.0                 | 99.7 $ \pm 15/2\rangle$                           | 0.000057439 | 0.000068080 | 19.835068057 |
| KD2 | 391.0               | 96.9 $ \pm 13/2\rangle$                           | 0.001181104 | 0.001419605 | 17.167343333 |
| KD3 | 714.8               | 88.9 $ \pm 11/2\rangle$ , 7.6 $ \pm 9/2\rangle$   | 0.077082459 | 0.093701119 | 14.276893586 |
| KD4 | 959.6               | 79.0 $ \pm 9/2\rangle$ , 8.7 $ \pm 7/2\rangle$    | 0.801305540 | 1.011303593 | 11.234348675 |
| KD5 | 1103.8              | 66.7 $ \pm 7/2\rangle$ , 17.1 $ \pm 3/2\rangle$   | 3.925324905 | 4.379663041 | 8.175329849  |
| KD6 | 1194.0              | 55.4 $ \pm 5/2\rangle$ , 18.2 $ \pm 1/2\rangle$   | 1.746680567 | 3.631094277 | 10.583789365 |
| KD7 | 1276.2              | 39.4 $ \pm 3/2\rangle$ , 26.6 $ \pm 1/2\rangle$   | 1.211367563 | 1.875583404 | 14.675425884 |
| KD8 | 1347.8              | 48.7 $ \pm 1/2\rangle$ , 36.6 $ \pm 3/2\rangle$   | 0.358235458 | 1.181230893 | 18.278845042 |

<sup>a</sup> only two largest contributions exceeding 5% are listed

**Table S4c.** Ligand-field splitting for Dy<sup>3+</sup> ion in DyY<sub>2</sub>N@C<sub>80</sub> computed at the CASSCF/RASSI level

|     | <i>E</i> , cm <sup>-1</sup> | % composition in   <i>m<sub>J</sub></i> ⟩ basis <sup>a</sup> | g-tensor:            |                      |                      |
|-----|-----------------------------|--------------------------------------------------------------|----------------------|----------------------|----------------------|
|     |                             |                                                              | <i>g<sub>x</sub></i> | <i>g<sub>y</sub></i> | <i>g<sub>z</sub></i> |
| KD1 | 0.0                         | 99.8  ±15/2⟩                                                 | 0.000087129          | 0.000102980          | 19.825465044         |
| KD2 | 428.9                       | 95.4  ±13/2⟩                                                 | 0.001592197          | 0.001819946          | 17.205233027         |
| KD3 | 736.9                       | 82.9  ±11/2⟩, 12.7  ±9/2⟩                                    | 0.090696714          | 0.110350806          | 14.305018976         |
| KD4 | 971.4                       | 70.4  ±9/2⟩, 14.5  ±7/2⟩                                     | 1.080836434          | 1.354016265          | 11.216318981         |
| KD5 | 1109.5                      | 66.1  ±7/2⟩, 12.7  ±3/2⟩                                     | 3.762120042          | 4.058762432          | 8.640300329          |
| KD6 | 1205.0                      | 64.1  ±5/2⟩, 13.1  ±1/2⟩                                     | 1.463583894          | 3.405546193          | 10.519101476         |
| KD7 | 1287.2                      | 49.0  ±3/2⟩, 26.1  ±1/2⟩                                     | 1.520186130          | 2.688622088          | 14.047848473         |
| KD8 | 1380.2                      | 56.2  ±1/2⟩, 32.9  ±3/2⟩                                     | 0.311906373          | 1.016380996          | 18.259690692         |

<sup>a</sup> only two largest contributions exceeding 5% are listed**Table S4d.** Ligand-field splitting for Dy<sup>3+</sup> ion in DyLa<sub>2</sub>N@C<sub>80</sub> computed at the CASSCF/RASSI level

|     | <i>E</i> , cm <sup>-1</sup> | % composition in   <i>m<sub>J</sub></i> ⟩ basis <sup>a</sup> | g-tensor:            |                      |                      |
|-----|-----------------------------|--------------------------------------------------------------|----------------------|----------------------|----------------------|
|     |                             |                                                              | <i>g<sub>x</sub></i> | <i>g<sub>y</sub></i> | <i>g<sub>z</sub></i> |
| KD1 | 0.0                         | 99.7  ±15/2⟩                                                 | 0.000252566          | 0.000362489          | 19.755849226         |
| KD2 | 489.0                       | 94.1  ±13/2⟩, 5.2  ±11/2⟩                                    | 0.012765680          | 0.014680536          | 17.152509015         |
| KD3 | 763.5                       | 75.1  ±11/2⟩, 18.5  ±9/2⟩                                    | 0.205516148          | 0.238115213          | 14.320635946         |
| KD4 | 959.8                       | 58.0  ±9/2⟩, 25.0  ±7/2⟩                                     | 1.010444640          | 1.374718861          | 11.282404739         |
| KD5 | 1114.6                      | 59.9  ±7/2⟩, 15.8  ±3/2⟩                                     | 3.212825474          | 4.872462354          | 8.843589951          |
| KD6 | 1223.6                      | 71.8  ±5/2⟩, 11.5  ±7/2⟩                                     | 8.285075877          | 7.802033698          | 0.694423581          |
| KD7 | 1298.5                      | 66.9  ±3/2⟩, 19.5  ±1/2⟩                                     | 2.045003298          | 3.173212768          | 13.069991596         |
| KD8 | 1398.7                      | 73.3  ±1/2⟩, 23.3  ±3/2⟩                                     | 0.473001808          | 1.695893464          | 17.488904704         |

<sup>a</sup> only two largest contributions exceeding 5% are listed

**Table S5a.** Ligand-field splitting for Dy<sup>3+</sup> ion (Dy1) in Dy<sub>2</sub>YN@C<sub>80</sub> computed at the CASSCF/RASSI level

|     | <i>E</i> , cm <sup>-1</sup> | % composition in   <i>m<sub>J</sub></i> ⟩ basis <sup>a</sup> | g-tensor:            |                      |                      |
|-----|-----------------------------|--------------------------------------------------------------|----------------------|----------------------|----------------------|
|     |                             |                                                              | <i>g<sub>x</sub></i> | <i>g<sub>y</sub></i> | <i>g<sub>z</sub></i> |
| KD1 | 0.0                         | 99.8  ±15/2⟩                                                 | 0.000095067          | 0.000108013          | 19.819128720         |
| KD2 | 423.4                       | 95.5  ±13/2⟩                                                 | 0.001270688          | 0.001476918          | 17.196821570         |
| KD3 | 735.0                       | 83.6  ±11/2⟩, 12.2  ±9/2⟩                                    | 0.086875904          | 0.106233352          | 14.296019162         |
| KD4 | 973.7                       | 71.2  ±9/2⟩, 13.9  ±7/2⟩                                     | 1.050469410          | 1.340435780          | 11.208844403         |
| KD5 | 1111.9                      | 65.6  ±7/2⟩, 13.9  ±3/2⟩                                     | 3.861446084          | 4.041246343          | 8.419148757          |
| KD6 | 1207.0                      | 62.9  ±5/2⟩, 14.1  ±1/2⟩                                     | 1.653139676          | 3.323269952          | 10.508159835         |
| KD7 | 1289.6                      | 47.5  ±3/2⟩, 25.7  ±1/2⟩                                     | 1.432462995          | 2.413871749          | 14.292412541         |
| KD8 | 1377.9                      | 55.0  ±1/2⟩, 33.4  ±3/2⟩                                     | 0.321522078          | 1.047391709          | 18.243716858         |

<sup>a</sup> only two largest contributions exceeding 5% are listed**Table S5b.** Ligand-field splitting for Dy<sup>3+</sup> ion (Dy2) in Dy<sub>2</sub>YN@C<sub>80</sub> computed at the CASSCF/RASSI level

|     | <i>E</i> , cm <sup>-1</sup> | % composition in   <i>m<sub>J</sub></i> ⟩ basis <sup>a</sup> | g-tensor:            |                      |                      |
|-----|-----------------------------|--------------------------------------------------------------|----------------------|----------------------|----------------------|
|     |                             |                                                              | <i>g<sub>x</sub></i> | <i>g<sub>y</sub></i> | <i>g<sub>z</sub></i> |
| KD1 | 0.0                         | 99.8  ±15/2⟩                                                 | 0.000095235          | 0.000109316          | 19.867361332         |
| KD2 | 426.7                       | 94.4  ±13/2⟩                                                 | 0.001455639          | 0.001675511          | 17.133081802         |
| KD3 | 736.6                       | 80.0  ±11/2⟩, 14.7  ±9/2⟩                                    | 0.089649243          | 0.109683358          | 14.238290741         |
| KD4 | 973.4                       | 66.3  ±9/2⟩, 17.2  ±7/2⟩                                     | 1.061706865          | 1.353904857          | 11.201524092         |
| KD5 | 1111.1                      | 62.4  ±7/2⟩, 13.3  ±3/2⟩                                     | 3.831284710          | 4.030087649          | 8.490817681          |
| KD6 | 1206.7                      | 63.0  ±5/2⟩, 14.2  ±1/2⟩                                     | 1.636076865          | 3.349072291          | 10.486348514         |
| KD7 | 1289.8                      | 50.1  ±3/2⟩, 23.4  ±1/2⟩                                     | 1.454087931          | 2.486235030          | 14.236628747         |
| KD8 | 1381.4                      | 57.4  ±1/2⟩, 32.2  ±3/2⟩                                     | 0.310653690          | 0.995708179          | 18.218497404         |

<sup>a</sup> only two largest contributions exceeding 5% are listed

**Table S6a.** Ligand-field splitting for Dy<sup>3+</sup> ion (Dy1) in Dy<sub>2</sub>LaN@C<sub>80</sub> computed at the CASSCF/RASSI level

|     | $E, \text{cm}^{-1}$ | % composition in $ m_j\rangle$ basis <sup>a</sup> | g-tensor:   |             |              |
|-----|---------------------|---------------------------------------------------|-------------|-------------|--------------|
|     |                     |                                                   | $g_x$       | $g_y$       | $g_z$        |
| KD1 | 0.0                 | 99.6 $ \pm 15/2\rangle$                           | 0.000307904 | 0.000328498 | 19.784955689 |
| KD2 | 440.4               | 95.3 $ \pm 13/2\rangle$                           | 0.005947776 | 0.006829800 | 17.159290499 |
| KD3 | 743.5               | 82.3 $ \pm 11/2\rangle$ , 12.8 $ \pm 9/2\rangle$  | 0.022483908 | 0.038783684 | 14.289903987 |
| KD4 | 967.0               | 70.8 $ \pm 9/2\rangle$ , 15.2 $ \pm 7/2\rangle$   | 0.941180072 | 1.125964876 | 11.442232232 |
| KD5 | 1108.8              | 68.3 $ \pm 7/2\rangle$ , 10.1 $ \pm 9/2\rangle$   | 3.770652774 | 4.414660589 | 9.134727423  |
| KD6 | 1197.3              | 64.7 $ \pm 5/2\rangle$ , 11.6 $ \pm 1/2\rangle$   | 9.947185568 | 5.157816695 | 0.211213789  |
| KD7 | 1269.9              | 48.5 $ \pm 3/2\rangle$ , 26.4 $ \pm 1/2\rangle$   | 1.926148735 | 4.011647790 | 13.525243642 |
| KD8 | 1394.5              | 57.2 $ \pm 1/2\rangle$ , 33.3 $ \pm 3/2\rangle$   | 0.289945752 | 0.879189721 | 18.207434567 |

<sup>a</sup> only two largest contributions exceeding 5% are listed**Table S6b.** Ligand-field splitting for Dy<sup>3+</sup> ion (Dy2) in Dy<sub>2</sub>LaN@C<sub>80</sub> computed at the CASSCF/RASSI level

|     | $E, \text{cm}^{-1}$ | % composition in $ m_j\rangle$ basis <sup>a</sup> | g-tensor:   |             |              |
|-----|---------------------|---------------------------------------------------|-------------|-------------|--------------|
|     |                     |                                                   | $g_x$       | $g_y$       | $g_z$        |
| KD1 | 0.0                 | 99.8 $ \pm 15/2\rangle$                           | 0.000174441 | 0.000226179 | 19.846735321 |
| KD2 | 460.2               | 94.9 $ \pm 13/2\rangle$                           | 0.006903388 | 0.008291310 | 17.114617785 |
| KD3 | 743.3               | 78.1 $ \pm 11/2\rangle$ , 17.1 $ \pm 9/2\rangle$  | 0.091373586 | 0.098553760 | 14.246652776 |
| KD4 | 953.3               | 61.2 $ \pm 9/2\rangle$ , 23.1 $ \pm 7/2\rangle$   | 1.335970130 | 1.620047474 | 11.256977706 |
| KD5 | 1102.7              | 57.6 $ \pm 7/2\rangle$ , 15.3 $ \pm 5/2\rangle$   | 3.120096247 | 4.277234765 | 8.331887606  |
| KD6 | 1207.0              | 59.2 $ \pm 5/2\rangle$ , 16.5 $ \pm 1/2\rangle$   | 9.476498202 | 5.681259752 | 1.859846277  |
| KD7 | 1300.8              | 58.4 $ \pm 3/2\rangle$ , 17.7 $ \pm 5/2\rangle$   | 1.455445168 | 1.784358488 | 14.143198173 |
| KD8 | 1382.5              | 69.3 $ \pm 1/2\rangle$ , 24.0 $ \pm 3/2\rangle$   | 0.435116658 | 1.419269115 | 17.979415374 |

<sup>a</sup> only two largest contributions exceeding 5% are listed

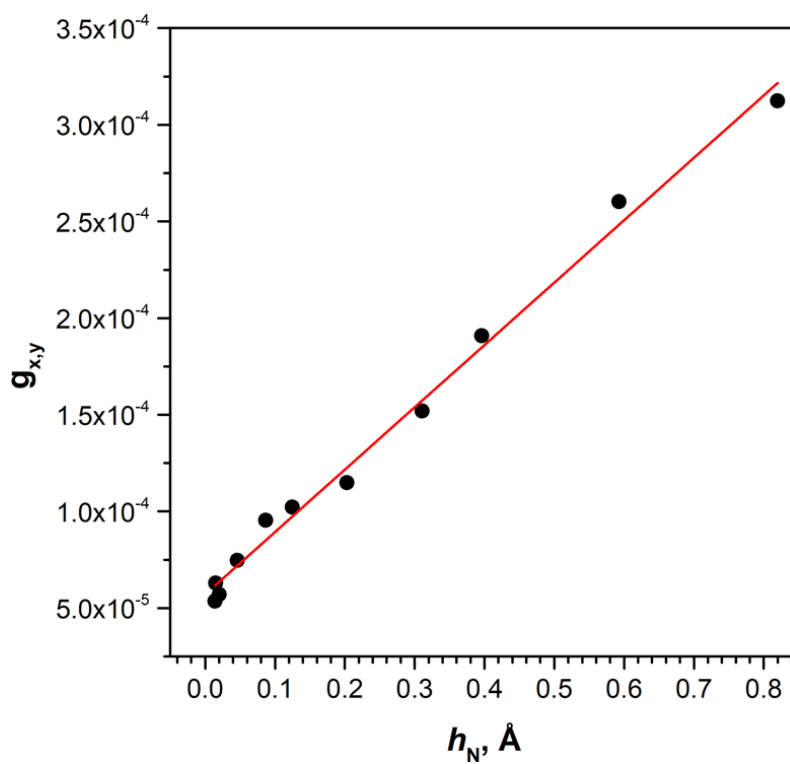

**Figure S5.** Correlation between  $g_{x,y}$  of the ground-state KD and  $h_N$  (nitrogen out-of-plane displacement) in the series of Dy-containing  $M_3N@C_{80}$  molecules (see Fig. 5 in the main text). Red line is the linear fit.

### Magnetic properties

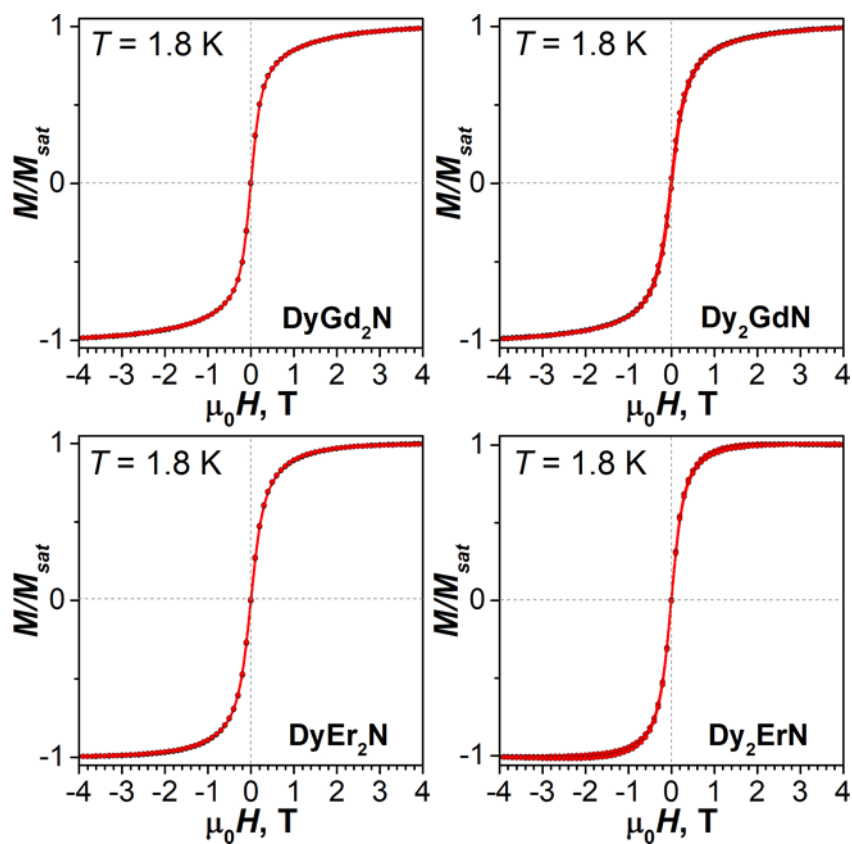

**Figure S6.** Magnetization curves measured for  $DyGd_2N@C_{80}$ ,  $Dy_2GdN@C_{80}$ ,  $DyEr_2N@C_{80}$ , and  $Dy_2ErN@C_{80}$  at  $T = 1.8$  K. From this group, only  $Dy_2GdN@C_{80}$  shows narrow opening of magnetic hysteresis at 1.8 K (see Ref. <sup>33</sup> for a detailed study of its relaxation behavior)



## Effective spin Hamiltonian

In the lowest-energy part of the spectrum, the system of two Dy ions with strong axial ligand field gives two quasi-doublets with ferromagnetic (FM) and antiferromagnetic (AFM) alignment of Dy<sup>3+</sup> magnetic moments (Fig. S7). In Dy<sub>2</sub>MN@C<sub>80</sub> molecule, both states have non-zero magnetic moment equal (in μ<sub>B</sub>)  $g_z \sin(\alpha/2)$  and  $g_z \cos(\alpha/2)$  (where  $g_z$  is pseudospin g-tensor describing single-ion ground state, such as listed in Table S4-S6, and  $\alpha$  is the angle between quantization axes). The state with a smaller moment is considered to be AFM, and the one with the larger moment is FM. These states can be described using the effective spin Hamiltonian as discussed in the main text:

$$\hat{H}_{\text{spin}} = \hat{H}_{\text{LF}_1} + \hat{H}_{\text{LF}_2} - 2j_{12}\hat{J}_1 \cdot \hat{J}_2 + \hat{H}_{\text{ZEE}} \quad (1)$$

where  $\hat{H}_{\text{LF}_i}$  are single-ion ligand-field Hamiltonians of Dy<sup>3+</sup>,  $j_{12}$  is the coupling constant between dysprosium moments, and  $\hat{H}_{\text{ZEE}}$  is the Zeeman term describing interaction of Dy<sup>3+</sup> magnetic moments with the external magnetic field. In essence, this Hamiltonian uses single-ion ligand field ( $\hat{H}_{\text{LF}_i}$ ) terms to split Dy<sup>3+</sup> multiplets into LF states (Table S4-S6), and then adds interactions between individual LF states in a bilinear form with effective constant  $j_{12}$ , which includes both exchange and dipolar interactions. We use *ab initio* computed ligand field parameters in  $\hat{H}_{\text{LF}_i}$ , and Dy<sup>3+</sup> moments  $\hat{J}_i$  are treated in the  $|J, m_j\rangle$  basis sets of the <sup>6</sup>H<sub>15/2</sub> multiplet. The spectrum of the Hamiltonian also includes higher-energy states resulting from the interaction of excited LF states of single ions, but if the LF splitting is large, these states will have noticeable contribution only at high temperatures.

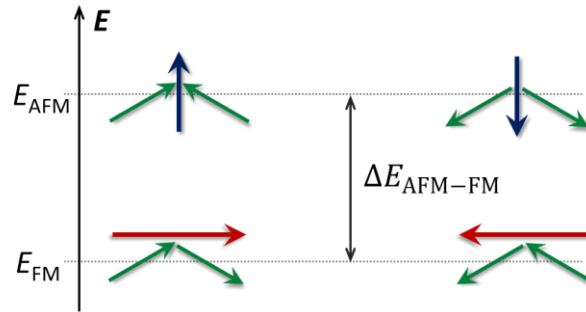

**Figure S7.** Schematic description of two quasi-doublets in the low-energy part of the {Dy<sub>2</sub>} system with Ising-type Dy<sup>3+</sup> moments. Green arrows denote magnetic moments of individual Dy<sup>3+</sup> ions ( $\approx 10 \mu_B$  each), red and blue arrows are magnetic moments of coupled states ( $\mu_{\text{AFM}} = g_z \sin(\alpha/2)\mu_B$ ;  $\mu_{\text{FM}} = g_z \cos(\alpha/2)\mu_B$ ). The energy difference between AFM and FM states is  $\Delta E_{\text{AFM-FM}}$ .

The Hamiltonian (1) was used in the fitting of experimental magnetization curves of Dy<sub>2</sub>YN@C<sub>80</sub> and Dy<sub>2</sub>LaN@C<sub>80</sub>. In the fitting,  $j_{12}$  was treated as a free parameter, and computed curves were powder-averaged to be compatible with experimental magnetization curves measured for powder samples. Only experimental points in the field range where hysteresis is very narrow or completely closed were used as Hamiltonian (1) describes only magnetization in equilibrium and hence cannot be used to model magnetic hysteresis. In Fig. S8, experimental magnetization curves are compared to results of simulations with fitted parameters. The same fitted parameters were then used to simulate  $\chi T$  curves shown in Fig. S9.

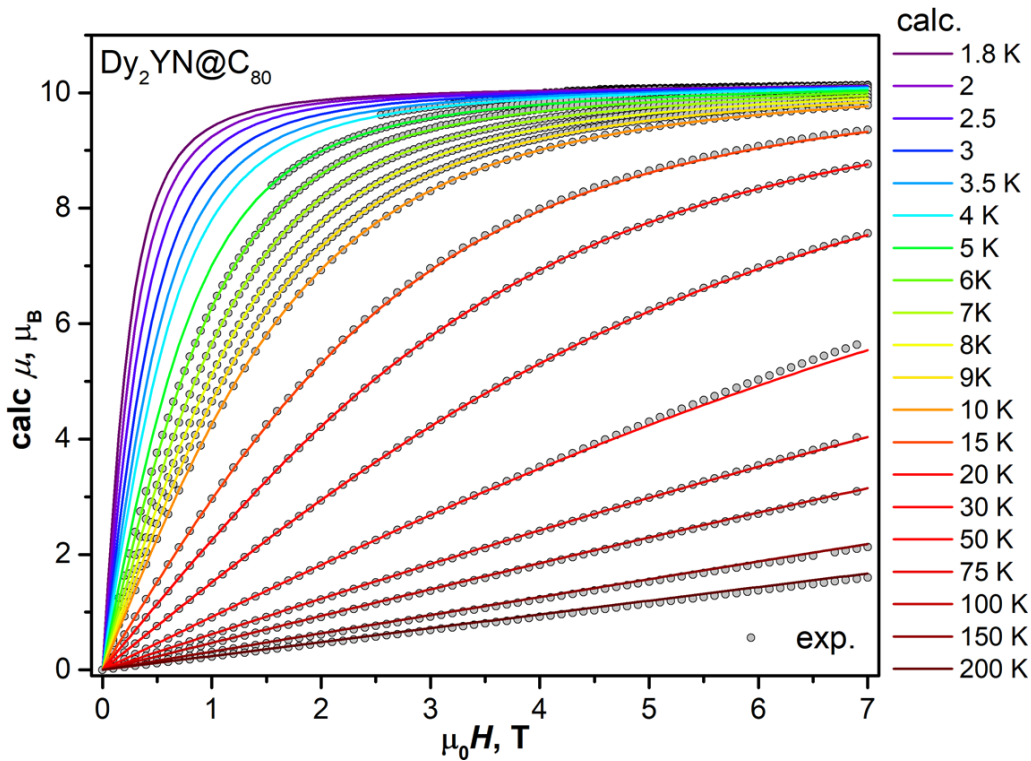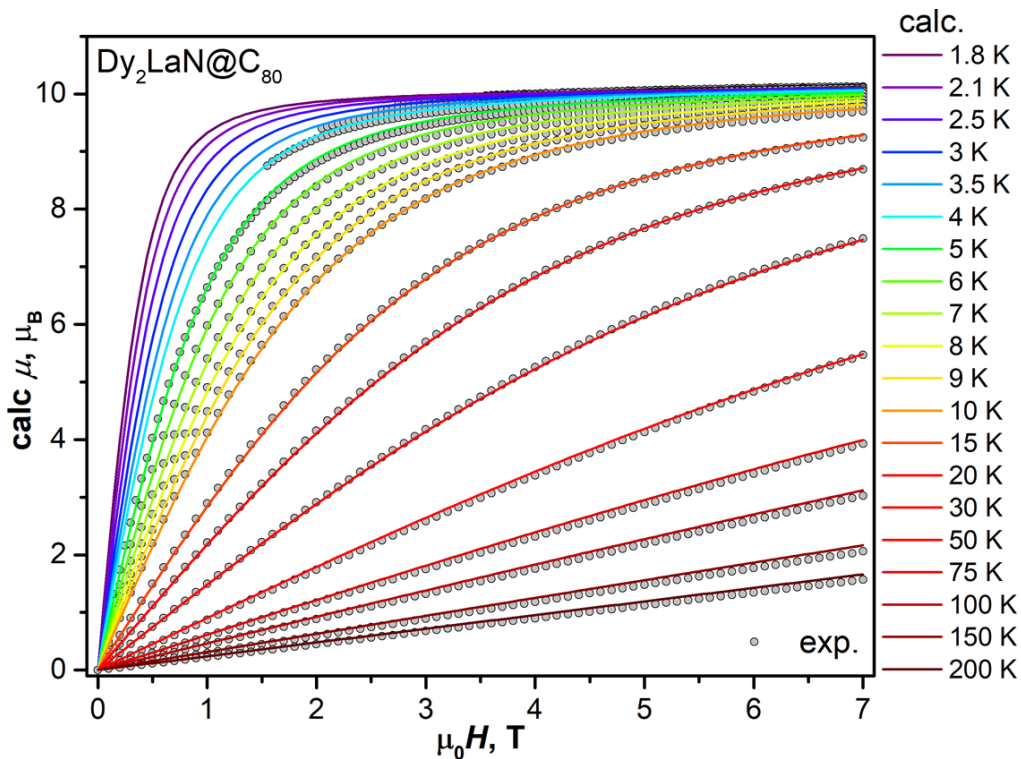

**Figure S8.** Experimental (dots) and fitted (colored lines) magnetization curves of Dy<sub>2</sub>YN@C<sub>80</sub> (top) and Dy<sub>2</sub>LaN@C<sub>80</sub> (bottom). Note that at low temperature, only high-field experimental points were used in fitting since at lower field the hysteresis was open.

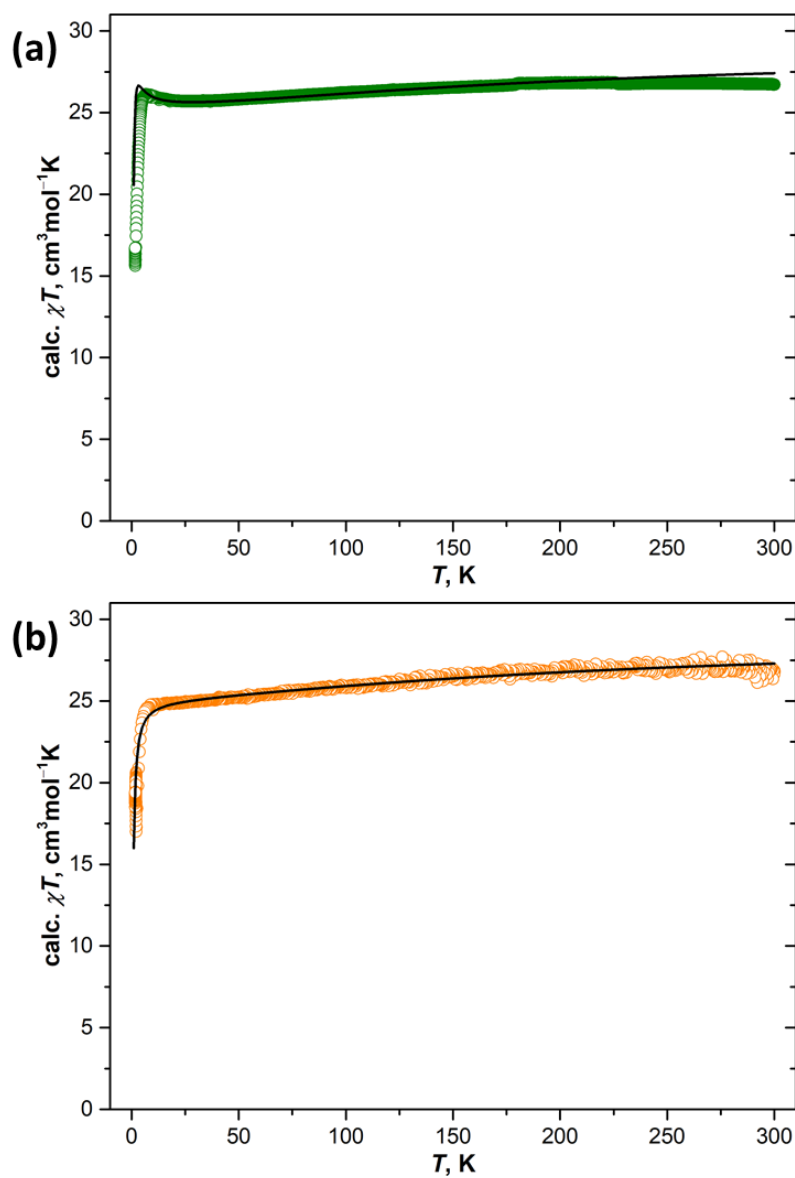

**Figure S9.** Experimental (dots) and simulated (black lines)  $\chi T$  curves of  $\text{Dy}_2\text{YN}@C_{80}$  (a) and  $\text{Dy}_2\text{LaN}@C_{80}$  (b),  $\chi$  is defined as  $M/H$  in the field of 0.2 T. Simulations are performed with  $j_{12}$  values determined in the fit of magnetization curves.

### Relaxation times

Magnetization decay curves were measured after the samples were first magnetized at 7 Tesla and then the field was quickly ramped to 0 T or 0.2 T. The decay curves were fitted with stretched exponential function:

$$M(t) = M_{eq} + (M_0 - M_{eq}) \exp \left[ - \left( \frac{t}{\tau_M} \right)^\beta \right]$$

Where  $M_{eq}$  and  $M_0$  are the equilibrium and initial magnetizations, respectively,  $\tau_M$  is a characteristic relaxation time and  $\beta$  is a parameter, characterizing distribution of relaxation rates in the sample. For a single-exponential decay,  $\beta = 1$ .

In AC magnetometry studies, the in-phase and out-of-phase susceptibility,  $\chi'(\nu)$  and  $\chi''(\nu)$ , were measured as a function of oscillation frequency  $\nu$  and then fitted with the generalized Debye model:

$$\chi'(\nu) = \chi_S + (\chi_T - \chi_S) \frac{1 + (\nu\tau_M)^{1-\alpha} \sin\left(\frac{\pi\alpha}{2}\right)}{1 + 2(\nu\tau_M)^{1-\alpha} \sin\left(\frac{\pi\alpha}{2}\right) + (\nu\tau_M)^{2-2\alpha}}$$

$$\chi''(\nu) = (\chi_T - \chi_S) \frac{(\nu\tau_M)^{1-\alpha} \cos\left(\frac{\pi\alpha}{2}\right)}{1 + 2(\nu\tau_M)^{1-\alpha} \sin\left(\frac{\pi\alpha}{2}\right) + (\nu\tau_M)^{2-2\alpha}}$$

Relaxation times  $\tau_M$  and parameters  $\alpha$  determined from the fits are listed in Table S4. Fitted curves along with the measured points are shown in Fig. 6 in the main text.

**Table S7a.** Magnetization relaxation times ( $\tau_M$ ) and  $\beta$  parameters of DyY<sub>2</sub>N@C<sub>80</sub> determined from DC measurements in the field of 0.2 T

| $T, K$ | $\tau_M, s$ | $\pm\tau_M$ | $\beta$ | $\pm\beta$ |
|--------|-------------|-------------|---------|------------|
| 2.8    | 5158.6      | 4.8         | 0.72    | 0.000      |
| 3.0    | 3349.8      | 1.7         | 0.74    | 0.000      |
| 3.2    | 2288.3      | 1.1         | 0.75    | 0.000      |
| 3.6    | 1190.7      | 0.8         | 0.76    | 0.001      |
| 4.0    | 682.1       | 1.0         | 0.75    | 0.001      |
| 4.4    | 450.7       | 0.5         | 0.83    | 0.001      |
| 5.0    | 233.8       | 0.4         | 0.84    | 0.002      |
| 5.5    | 148.7       | 0.3         | 0.83    | 0.002      |
| 6.0    | 102.1       | 0.3         | 0.83    | 0.003      |
| 7.0    | 48.0        | 0.1         | 0.78    | 0.002      |
| 8.0    | 28.7        | 0.3         | 0.67    | 0.007      |

**Table S7b.** Magnetization relaxation times ( $\tau_M$ ) and  $\beta$  parameters of Dy<sub>2</sub>YN@C<sub>80</sub> determined from DC measurements in the fields of 0 T and 0.2 T

| $T, K$ | $H = 0 T$   |             |         |            | $H = 0.2 T$ |             |         |            |
|--------|-------------|-------------|---------|------------|-------------|-------------|---------|------------|
|        | $\tau_M, s$ | $\pm\tau_M$ | $\beta$ | $\pm\beta$ | $\tau_M, s$ | $\pm\tau_M$ | $\beta$ | $\pm\beta$ |
| 1.80   | 1250.7      | 5.5         | 0.62    | 0.003      | 728.9       | 0.9         | 0.67    | 0.001      |
| 1.85   | 1206.6      | 1.0         | 0.59    | 0.001      | 795.6       | 1.5         | 0.75    | 0.002      |
| 1.90   | 1113.3      | 3.8         | 0.64    | 0.003      | 648.1       | 0.9         | 0.66    | 0.001      |
| 2.00   | 941.1       | 3.0         | 0.63    | 0.003      | 572.8       | 1.3         | 0.69    | 0.002      |
| 2.10   | 821.0       | 23.2        | 0.62    | 0.023      | 483.0       | 1.0         | 0.71    | 0.001      |
| 2.20   | 690.9       | 9.6         | 0.62    | 0.009      | 411.8       | 1.0         | 0.72    | 0.001      |
| 2.27   | 605.4       | 0.9         | 0.60    | 0.001      | 450.1       | 1.3         | 0.82    | 0.002      |
| 2.35   | 556.0       | 1.9         | 0.63    | 0.003      | 322.6       | 1.1         | 0.76    | 0.002      |
| 2.50   | 434.4       | 1.5         | 0.62    | 0.003      | 298.9       | 0.5         | 0.72    | 0.001      |
| 2.65   | 350.0       | 1.5         | 0.63    | 0.003      | 203.6       | 1.3         | 0.80    | 0.002      |
| 2.80   | 271.0       | 1.1         | 0.63    | 0.004      | 180.2       | 1.0         | 0.77    | 0.002      |
| 2.95   | 210.7       | 0.5         | 0.66    | 0.002      | 224.8       | 0.5         | 0.84    | 0.002      |
| 3.10   | 157.2       | 0.7         | 0.73    | 0.613      | 130.3       | 0.6         | 0.77    | 0.003      |
| 3.25   | 129.3       | 0.5         | 0.71    | 0.002      | 132.3       | 0.6         | 0.84    | 0.003      |
| 3.40   | 113.4       | 0.5         | 0.67    | 0.003      | 127.0       | 0.3         | 0.87    | 0.001      |
| 3.50   | 89.2        | 0.5         | 0.74    | 0.006      | 84.4        | 0.2         | 0.77    | 0.002      |
| 3.65   | 91.7        | 0.2         | 0.71    | 0.002      | 118.6       | 0.3         | 0.88    | 0.002      |
| 3.80   | 77.3        | 0.1         | 0.69    | 0.002      | 111.5       | 0.7         | 0.88    | 0.004      |
| 4.00   | 55.2        | 2.6         | 0.69    | 0.002      | 56.2        | 0.1         | 0.73    | 0.002      |

**Table S7c.** Magnetization relaxation times ( $\tau_M$ ) and  $\beta$  parameters of Dy<sub>2</sub>LaN@C<sub>80</sub> determined from DC measurements in the fields of 0 T and 0.2 T

| <i>T</i> , K | <i>H</i> = 0 T |             |         |            | <i>H</i> = 0.2 T |             |         |            |
|--------------|----------------|-------------|---------|------------|------------------|-------------|---------|------------|
|              | $\tau_M$ , s   | $\pm\tau_M$ | $\beta$ | $\pm\beta$ | $\tau_M$ , s     | $\pm\tau_M$ | $\beta$ | $\pm\beta$ |
| 1.80         | 124.1          | 0.41        | 0.67    | 0.002      | 91.3             | 0.39        | 0.75    | 0.004      |
| 1.85         | 122.8          | 0.29        | 0.67    | 0.002      | 87.7             | 0.23        | 0.76    | 0.002      |
| 1.90         | 116.7          | 0.48        | 0.67    | 0.003      | 75.3             | 0.52        | 0.74    | 0.006      |
| 1.95         | 110.9          | 0.46        | 0.67    | 0.003      | 69.3             | 0.52        | 0.74    | 0.007      |
| 2.00         | 106.4          | 0.39        | 0.67    | 0.002      | 77.0             | 0.42        | 0.77    | 0.006      |
| 2.05         | 102.4          | 0.26        | 0.74    | 0.003      | 72.1             | 0.41        | 0.76    | 0.006      |
| 2.10         | 81.7           | 0.51        | 0.64    | 0.006      | 74.0             | 0.28        | 0.72    | 0.003      |
| 2.15         | 91.8           | 0.19        | 0.72    | 0.002      | 58.7             | 0.48        | 0.73    | 0.008      |
| 2.20         | 78.5           | 0.43        | 0.69    | 0.005      | 57.4             | 0.52        | 0.89    | 0.012      |
| 2.25         | 86.9           | 0.11        | 0.75    | 0.001      | 60.2             | 0.36        | 0.75    | 0.006      |
| 2.30         | 83.6           | 0.13        | 0.74    | 0.002      | 58.8             | 0.33        | 0.81    | 0.006      |
| 2.35         | 66.9           | 0.49        | 0.65    | 0.006      | 56.8             | 0.35        | 0.78    | 0.006      |
| 2.40         | 62.7           | 0.43        | 0.65    | 0.005      | 52.7             | 0.26        | 0.67    | 0.004      |
| 2.45         | 72.7           | 0.16        | 0.72    | 0.002      | 45.3             | 0.44        | 0.76    | 0.009      |
| 2.50         | 56.8           | 0.51        | 0.66    | 0.006      | 48.9             | 0.40        | 0.77    | 0.008      |

**Table S8a.** Magnetization relaxation times ( $\tau_M$ ) and  $\alpha$  parameters of DyY<sub>2</sub>N@C<sub>80</sub> determined from AC measurements in zero field

| $T, K$ | $\tau_M, s$ | $\pm\tau_M$ | $\alpha$ | $\pm\alpha$ |
|--------|-------------|-------------|----------|-------------|
| 5.00   | 1.532E+00   | 4.628E-02   | 0.25     | 0.006       |
| 5.56   | 1.434E+00   | 7.744E-02   | 0.25     | 0.009       |
| 6.25   | 1.248E+00   | 3.581E-02   | 0.25     | 0.006       |
| 7.14   | 1.164E+00   | 4.001E-02   | 0.25     | 0.008       |
| 8.33   | 8.864E-01   | 2.123E-02   | 0.23     | 0.007       |
| 10.00  | 6.978E-01   | 2.049E-02   | 0.25     | 0.008       |
| 11.25  | 5.570E-01   | 1.422E-02   | 0.21     | 0.009       |
| 12.86  | 4.261E-01   | 8.910E-03   | 0.20     | 0.008       |
| 15.00  | 2.828E-01   | 3.310E-03   | 0.18     | 0.005       |
| 17.30  | 2.025E-01   | 4.680E-03   | 0.16     | 0.012       |
| 20.00  | 1.385E-01   | 2.280E-03   | 0.15     | 0.009       |
| 22.22  | 1.155E-01   | 2.180E-03   | 0.14     | 0.010       |
| 25.00  | 8.797E-02   | 1.150E-03   | 0.13     | 0.007       |
| 27.27  | 7.208E-02   | 1.470E-03   | 0.14     | 0.010       |
| 30.00  | 5.727E-02   | 1.150E-03   | 0.10     | 0.012       |
| 32.31  | 4.830E-02   | 6.568E-04   | 0.11     | 0.007       |
| 35.00  | 4.006E-02   | 9.057E-04   | 0.09     | 0.013       |
| 37.33  | 3.276E-02   | 7.028E-04   | 0.09     | 0.012       |
| 40.00  | 2.849E-02   | 6.866E-04   | 0.08     | 0.014       |
| 42.35  | 2.509E-02   | 6.602E-04   | 0.11     | 0.014       |
| 45.00  | 2.122E-02   | 7.699E-04   | 0.08     | 0.022       |
| 47.37  | 1.815E-02   | 3.197E-04   | 0.08     | 0.010       |
| 50.00  | 1.413E-02   | 8.045E-04   | 0.09     | 0.033       |
| 52.38  | 1.287E-02   | 2.517E-04   | 0.13     | 0.011       |
| 55.00  | 1.028E-02   | 3.303E-04   | 0.16     | 0.018       |
| 57.39  | 7.530E-03   | 3.034E-04   | 0.21     | 0.020       |
| 60.00  | 5.730E-03   | 2.239E-04   | 0.22     | 0.019       |
| 60.00  | 5.770E-03   | 2.910E-04   | 0.20     | 0.025       |
| 61.76  | 4.160E-03   | 2.650E-04   | 0.26     | 0.029       |
| 63.64  | 3.520E-03   | 1.817E-04   | 0.28     | 0.022       |
| 65.63  | 2.590E-03   | 2.200E-04   | 0.28     | 0.034       |
| 67.74  | 1.590E-03   | 1.882E-04   | 0.35     | 0.034       |

**Table S8b.** Magnetization relaxation times ( $\tau_M$ ) and  $\alpha$  parameters of Dy<sub>2</sub>YN@C<sub>80</sub> determined from AC measurements in zero field

| $T, K$ | $\tau_M, s$ | $\pm\tau_M$ | $\alpha$ | $\pm\alpha$ |
|--------|-------------|-------------|----------|-------------|
| 6.00   | 2.862E+00   | 3.357E-01   | 0.52     | 0.008       |
| 6.50   | 1.486E+00   | 1.182E-01   | 0.49     | 0.007       |
| 7.00   | 8.867E-01   | 6.237E-02   | 0.48     | 0.008       |
| 7.50   | 5.813E-01   | 2.746E-02   | 0.47     | 0.006       |
| 8.00   | 3.970E-01   | 1.409E-02   | 0.45     | 0.006       |
| 8.50   | 2.941E-01   | 9.190E-03   | 0.44     | 0.006       |
| 9.00   | 2.212E-01   | 5.920E-03   | 0.44     | 0.006       |
| 9.50   | 1.713E-01   | 4.270E-03   | 0.43     | 0.006       |
| 10.00  | 1.355E-01   | 2.870E-03   | 0.42     | 0.005       |
| 12.00  | 6.656E-02   | 1.580E-03   | 0.40     | 0.007       |
| 15.00  | 3.139E-02   | 5.383E-04   | 0.37     | 0.006       |
| 16.67  | 2.364E-02   | 5.884E-04   | 0.36     | 0.009       |
| 18.75  | 1.730E-02   | 3.985E-04   | 0.34     | 0.008       |
| 21.40  | 1.304E-02   | 2.848E-04   | 0.32     | 0.008       |
| 25.00  | 9.610E-03   | 1.789E-04   | 0.29     | 0.007       |
| 28.20  | 8.000E-03   | 1.563E-04   | 0.28     | 0.008       |
| 32.40  | 6.530E-03   | 1.546E-04   | 0.25     | 0.009       |
| 38.00  | 5.280E-03   | 7.709E-05   | 0.21     | 0.006       |
| 41.00  | 4.820E-03   | 4.888E-05   | 0.19     | 0.005       |
| 43.00  | 4.490E-03   | 4.777E-05   | 0.19     | 0.005       |
| 45.00  | 4.290E-03   | 4.485E-05   | 0.17     | 0.005       |
| 47.00  | 4.000E-03   | 3.886E-05   | 0.16     | 0.005       |
| 49.00  | 3.650E-03   | 5.289E-05   | 0.15     | 0.007       |
| 51.00  | 3.350E-03   | 5.283E-05   | 0.15     | 0.007       |
| 52.00  | 3.220E-03   | 4.996E-05   | 0.15     | 0.007       |
| 53.00  | 3.040E-03   | 7.308E-05   | 0.16     | 0.010       |
| 54.00  | 2.900E-03   | 7.552E-05   | 0.16     | 0.011       |
| 56.00  | 2.610E-03   | 1.029E-04   | 0.15     | 0.013       |
| 57.00  | 2.530E-03   | 4.590E-05   | 0.15     | 0.007       |
| 58.00  | 2.430E-03   | 5.176E-05   | 0.14     | 0.008       |
| 59.00  | 2.290E-03   | 4.461E-05   | 0.16     | 0.007       |
| 60.00  | 1.990E-03   | 3.921E-05   | 0.17     | 0.008       |
| 61.00  | 1.810E-03   | 4.527E-05   | 0.19     | 0.010       |
| 62.00  | 1.550E-03   | 3.950E-05   | 0.20     | 0.010       |
| 62.00  | 1.550E-03   | 3.950E-05   | 0.20     | 0.010       |
| 63.00  | 1.540E-03   | 5.095E-05   | 0.19     | 0.013       |
| 64.00  | 1.420E-03   | 4.996E-05   | 0.20     | 0.013       |
| 65.00  | 1.190E-03   | 3.682E-05   | 0.23     | 0.011       |
| 66.00  | 1.270E-03   | 6.231E-05   | 0.18     | 0.018       |
| 67.00  | 1.080E-03   | 8.687E-05   | 0.24     | 0.023       |



| $T, K$ | $\tau_M, s$ | $\pm\tau_M$ | $\alpha$ | $\pm\alpha$ |
|--------|-------------|-------------|----------|-------------|
| 68.00  | 9.825E-04   | 4.669E-05   | 0.22     | 0.016       |
| 70.00  | 7.997E-04   | 3.393E-05   | 0.23     | 0.012       |
| 71.00  | 7.913E-04   | 4.907E-05   | 0.23     | 0.015       |
| 72.00  | 8.895E-04   | 4.807E-05   | 0.20     | 0.017       |
| 73.00  | 6.468E-04   | 5.944E-05   | 0.25     | 0.019       |
| 74.00  | 5.847E-04   | 7.023E-05   | 0.24     | 0.023       |
| 75.00  | 8.817E-04   | 9.280E-05   | 0.13     | 0.029       |
| 76.00  | 4.820E-04   | 1.009E-04   | 0.26     | 0.034       |
| 77.00  | 4.190E-04   | 1.113E-04   | 0.28     | 0.038       |

### Photoluminescence measurements

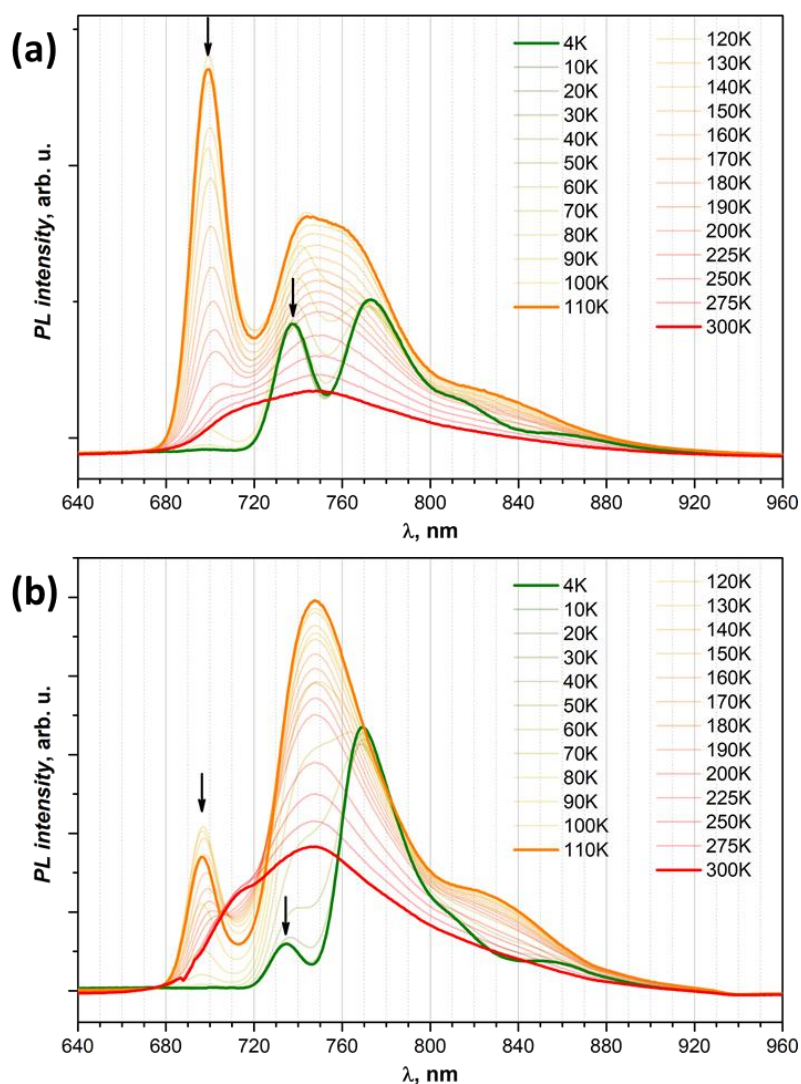

**Figure S10.** Variable-temperature photoluminescence measurements of  $\text{DyY}_2\text{N}@C_{80}$  in polystyrene after the first separation cycle (a) and after two additional separation steps (b). Arrows denote the strongest PL lines of  $\text{Y}_3\text{N}@C_{80}$  near 700 nm (fluorescence) and near 740 nm (phosphorescence). Once the PL signals of  $\text{Y}_3\text{N}@C_{80}$  are reduced after three purification runs, it becomes clear that remaining PL features belong to  $\text{Y}_2\text{ScN}@C_{80}$  described in Ref. <sup>34</sup>. Thus, there are no spectral features which can be assigned to  $\text{DyY}_2\text{N}@C_{80}$ , and we conclude that the compound is non-luminescent.

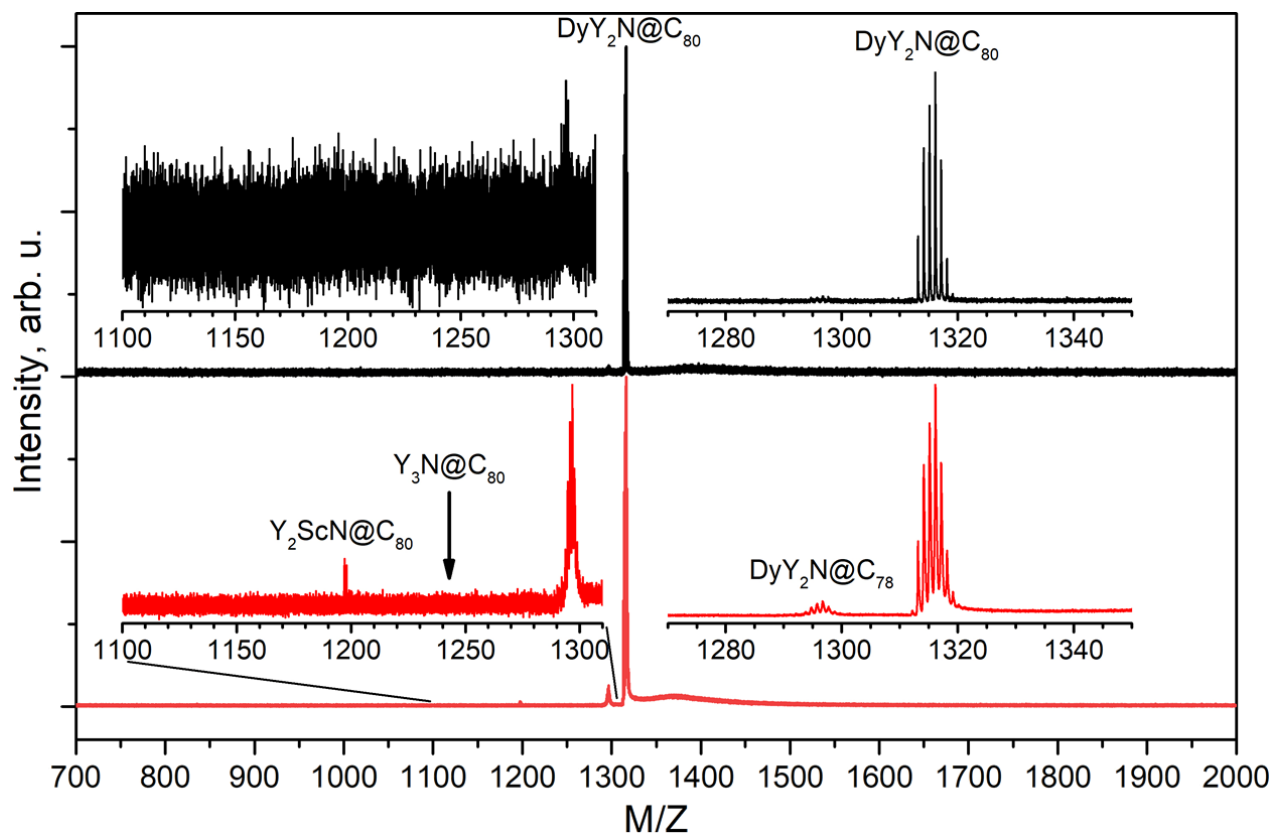

**Figure S11.** LDI mass spectra of  $\text{DyY}_2\text{N@C}_{80}$  after 3 purification cycles (the sample, which PL spectra are shown in Fig. S10b), positive ion mode. Upper panel (black curves) shows the spectrum measured with the standard laser power; bottom panel (red curves) is the spectrum measured with the increased laser power. While  $\text{DyY}_2\text{N@C}_{80}$  is the only peak detectable in normal conditions, an increase of the laser power results in the visible fragmentation of the fullerene (appearance of the peak of  $\text{DyY}_2\text{N@C}_{78}$ ). A tiny peak of  $\text{Y}_2\text{ScN@C}_{80}$  also becomes visible, whereas the signal of  $\text{Y}_3\text{N@C}_{80}$  remains below detection limit of LDI-MS.

## References

1. Mueller, U.; Förster, R.; Hellmig, M.; Huschmann, F. U.; Kastner, A.; Malecki, P.; Pühringer, S.; Röwer, M.; Sparta, K.; Steffien, M.; Ühlein, M.; Wilk, P.; Weiss, M. S., The macromolecular crystallography beamlines at BESSY II of the Helmholtz-Zentrum Berlin: Current status and perspectives. *Eur. Phys. J. Plus* **2015**, *130* (7), 141.
2. Kabsch, W., XDS. *Acta Cryst. D* **2010**, *66* (2), 125-132.
3. Sparta, K. M.; Krug, M.; Heinemann, U.; Mueller, U.; Weiss, M. S., XDSAPP2.0. *J. Appl. Crystallogr.* **2016**, *49* (3), 1085-1092.
4. Sheldrick, G., Crystal structure refinement with SHELXL. *Acta Cryst. C* **2015**, *71* (1), 3-8.
5. Chilton, N. F.; Anderson, R. P.; Turner, L. D.; Soncini, A.; Murray, K. S., PHI: A powerful new program for the analysis of anisotropic monomeric and exchange-coupled polynuclear d- and f-block complexes. *J. Comput. Chem.* **2013**, *34* (13), 1164-1175.
6. Schlesier, C.; Liu, F.; Dubrovin, V.; Spree, L.; Büchner, B.; Avdoshenko, S.; Popov, A. A., Mixed dysprosium-lanthanide nitride clusterfullerenes  $\text{DyM}_2\text{N}@C_{80-I_h}$  and  $\text{Dy}_2\text{MN}@C_{80-I_h}$  (M = Gd, Er, Tm, and Lu): synthesis, molecular structure, and quantum motion of the endohedral nitrogen atom. *Nanoscale* **2019**, *11*, 13139-13153
7. Hafner, J., Ab-initio simulations of materials using VASP: Density-functional theory and beyond. *J. Comput. Chem.* **2008**, *29* (13), 2044-2078.
8. Kresse, G.; Hafner, J., Ab initio molecular dynamics for liquid metals. *Phys. Rev. B* **1993**, *47* (1), 558-561.
9. Kresse, G.; Joubert, D., From ultrasoft pseudopotentials to the projector augmented-wave method. *Phys. Rev. B* **1999**, *59* (3), 1758-1775.
10. Perdew, J. P.; Burke, K.; Ernzerhof, M., Generalized gradient approximation made simple. *Phys. Rev. Lett.* **1996**, *77* (18), 3865-3868.
11. Grimme, S., Density functional theory with London dispersion corrections. *WIREs Comput. Mol. Sci.* **2011**, *1* (2), 211-228.
12. Aquilante, F.; Autschbach, J.; Baiardi, A.; Battaglia, S.; Borin, V. A.; Chibotaru, L. F.; Conti, I.; Vico, L. D.; Delcey, M.; Galván, I. F.; Ferré, N.; Freitag, L.; Garavelli, M.; Gong, X.; Knecht, S.; Larsson, E. D.; Lindh, R.; Lundberg, M.; Malmqvist, P. Å.; Nenov, A.; Norell, J.; Odelius, M.; Olivucci, M.; Pedersen, T. B.; Pedraza-González, L.; Phung, Q. M.; Pierloot, K.; Reiher, M.; Schapiro, I.; Segarra-Martí, J.; Segatta, F.; Seijo, L.; Sen, S.; Sergentu, D.-C.; Stein, C. J.; Ungur, L.; Vacher, M.; Valentini, A.; Veryazov, V., Modern quantum chemistry with [Open]Molcas. *J. Chem. Phys.* **2020**, *152* (21), 214117.
13. Chibotaru, L. F.; Ungur, L., Ab initio calculation of anisotropic magnetic properties of complexes. I. Unique definition of pseudospin Hamiltonians and their derivation. *J. Chem. Phys.* **2012**, *137* (6), 064112.
14. Stevenson, S.; Rice, G.; Glass, T.; Harich, K.; Cromer, F.; Jordan, M. R.; Craft, J.; Hadju, E.; Bible, R.; Olmstead, M. M.; Maitra, K.; Fisher, A. J.; Balch, A. L.; Dorn, H. C., Small-bandgap endohedral metallofullerenes in high yield and purity. *Nature* **1999**, *401* (6748), 55-57.
15. Hao, Y.; Wang, Y.; Spree, L.; Liu, F., Rotation of fullerene molecules in the crystal lattice of fullerene/porphyrin:  $\text{C}_{60}$  and  $\text{Sc}_3\text{N}@C_{80}$ . *Inorg. Chem. Front.* **2021**, *8*, 122-126.
16. Stevenson, S.; Phillips, J. P.; Reid, J. E.; Olmstead, M. M.; Rath, S. P.; Balch, A. L., Pyramidalization of  $\text{Gd}_3\text{N}$  inside a  $\text{C}_{80}$  cage. The synthesis and structure of  $\text{Gd}_3\text{N}@C_{80}$ . *Chem. Commun.* **2004**, (24), 2814-2815.
17. Zuo, T. M.; Beavers, C. M.; Duchamp, J. C.; Campbell, A.; Dorn, H. C.; Olmstead, M. M.; Balch, A. L., Isolation and structural characterization of a family of endohedral fullerenes including the large, chiral cage fullerenes  $\text{Tb}_3\text{N}@C_{88}$  and  $\text{Tb}_3\text{N}@C_{86}$  as well as the  $I_h$  and  $D_{5h}$  isomers of  $\text{Tb}_3\text{N}@C_{80}$ . *J. Am. Chem. Soc.* **2007**, *129* (7), 2035-2043.

18. Yang, S. F.; Troyanov, S. I.; Popov, A. A.; Krause, M.; Dunsch, L., Deviation from the planarity - a large Dy<sub>3</sub>N cluster encapsulated in an I<sub>h</sub>-C<sub>80</sub> cage: An X-ray crystallographic and vibrational spectroscopic study. *J. Am. Chem. Soc.* **2006**, *128* (51), 16733-16739.
19. Olmstead, M. M.; Zuo, T.; Dorn, H. C.; Li, T.; Balch, A. L., Metal ion size and the pyramidalization of trimetallic nitride units inside a fullerene cage: Comparisons of the crystal structures of M<sub>3</sub>N@I<sub>h</sub>-C<sub>80</sub> (M = Gd, Tb, Dy, Ho, Er, Tm, Lu, and Sc) and some mixed metal counterparts. *Inorg. Chim. Acta* **2017**, *468*, 321-326.
20. Hu, S.; Zhao, P.; Shen, W.; Yu, P.; Huang, W.; Ehara, M.; Xie, Y.; Akasaka, T.; Lu, X., Crystallographic characterization of Er<sub>3</sub>N@C<sub>2n</sub> (2n = 80, 82, 84, 88): the importance of a planar Er<sub>3</sub>N cluster. *Nanoscale* **2019**, *11* (28), 13415-13422.
21. Zuo, T.; Olmstead, M. M.; Beavers, C. M.; Balch, A. L.; Wang, G.; Yee, G. T.; Shu, C.; Xu, L.; Elliott, B.; Echegoyen, L.; Duchamp, J. C.; Dorn, H. C., Preparation and Structural Characterization of the I<sub>h</sub> and the D<sub>5h</sub> Isomers of the Endohedral Fullerenes Tm<sub>3</sub>N@C<sub>80</sub>: Icosahedral C<sub>80</sub> Cage Encapsulation of a Trimetallic Nitride Magnetic Cluster with Three Uncoupled Tm<sup>3+</sup> Ions. *Inorg. Chem.* **2008**, *47* (12), 5234-5244.
22. Shen, W.; Bao, L. B.; Hu, S.; Gao, X.; Xie, Y.; Gao, X.; Huang, W.; Lu, X., Isolation and Crystallographic Characterization of Lu<sub>3</sub>N@C<sub>2n</sub> (2n = 80-88): Cage Selection by Cluster Size. *Chem.-Eur. J.* **2018**, *24* (62), 16692-16698.
23. Liu, F.; Spree, L., Molecular spinning top: visualizing the dynamics of M<sub>3</sub>N@C<sub>80</sub> with variable temperature single crystal X-ray diffraction. *Chem. Commun.* **2019**, *55* (86), 13000-13003.
24. Stevenson, S.; Rose, C. B.; Maslenikova, J. S.; Villarreal, J. R.; Mackey, M. A.; Mercado, B. Q.; Chen, K.; Olmstead, M. M.; Balch, A. L., Selective Synthesis, Isolation, and Crystallographic Characterization of LaSc<sub>2</sub>N@I<sub>h</sub>-C<sub>80</sub>. *Inorg. Chem.* **2012**, *51* (24), 13096-13102.
25. Wang, X. L.; Zuo, T. M.; Olmstead, M. M.; Duchamp, J. C.; Glass, T. E.; Cromer, F.; Balch, A. L.; Dorn, H. C., Preparation and structure of CeSc<sub>2</sub>N@C<sub>80</sub>: An icosahedral carbon cage enclosing an acentric CeSc<sub>2</sub>N unit with buried f electron spin. *J. Am. Chem. Soc.* **2006**, *128* (27), 8884-8889.
26. Stevenson, S.; Chancellor, C.; Lee, H. M.; Olmstead, M. M.; Balch, A. L., Internal and External Factors in the Structural Organization in Cocrystals of the Mixed-Metal Endohedrals (GdSc<sub>2</sub>N@I<sub>h</sub>-C<sub>80</sub>, Gd<sub>2</sub>ScN@I<sub>h</sub>-C<sub>80</sub>, and TbSc<sub>2</sub>N@I<sub>h</sub>-C<sub>80</sub>) and Nickel(II) Octaethylporphyrin. *Inorg. Chem.* **2008**, *47* (5), 1420-1427.
27. Krylov, D.; Liu, F.; Brandenburg, A.; Spree, L.; Bon, V.; Kaskel, S.; Wolter, A.; Buchner, B.; Avdoshenko, S.; Popov, A. A., Magnetization relaxation in the single-ion magnet DySc<sub>2</sub>N@C<sub>80</sub>: quantum tunneling, magnetic dilution, and unconventional temperature dependence. *Phys. Chem. Chem. Phys.* **2018**, *20*, 11656-11672.
28. Olmstead, M. M.; de Bettencourt-Dias, A.; Duchamp, J. C.; Stevenson, S.; Dorn, H. C.; Balch, A. L., Isolation and crystallographic characterization of ErSc<sub>2</sub>N@C<sub>80</sub>: an endohedral fullerene which crystallizes with remarkable internal order. *J. Am. Chem. Soc.* **2000**, *122* (49), 12220-12226.
29. Wei, T.; Wang, S.; Lu, X.; Tan, Y.-Z.; Huang, J.; Liu, F.; Li, Q.; Xie, S.; Yang, S., Entrapping a Group-VB Transition Metal, Vanadium, within an Endohedral Metallofullerene: V<sub>x</sub>Sc<sub>3-x</sub>N@I<sub>h</sub>-C<sub>80</sub> (x=1, 2). *J. Am. Chem. Soc.* **2016**, *138* (1), 207-14.
30. Krylov, D. S.; Liu, F.; Avdoshenko, S. M.; Spree, L.; Weise, B.; Waske, A.; Wolter, A. U. B.; Büchner, B.; Popov, A. A., Record-high thermal barrier of the relaxation of magnetization in the nitride clusterfullerene Dy<sub>2</sub>ScN@C<sub>80</sub>-I<sub>h</sub>. *Chem. Commun.* **2017**, *53*, 7901-7904.
31. Stevenson, S.; Thompson, H. R.; Arvola, K. D.; Ghiassi, K. B.; Olmstead, M. M.; Balch, A. L., Isolation of CeLu<sub>2</sub>N@I<sub>h</sub>-C<sub>80</sub> through a Non-Chromatographic, Two-Step Chemical Process and Crystallographic Characterization of the Pyramidalized CeLu<sub>2</sub>N within the Icosahedral Cage. *Chem.-Eur. J.* **2015**, *21* (29), 10362-10368.

32. Nie, M.; Xiong, J.; Zhao, C.; Meng, H.; Zhang, K.; Han, Y.; Li, J.; Wang, B.; Feng, L.; Wang, C.; Wang, T., Luminescent single-molecule magnet of metallofullerene DyErScN@I<sub>h</sub>-C<sub>80</sub>. *Nano Res.* **2019**, *12* (7), 1727-1731.
33. Kostanyan, A.; Schlesier, C.; Westerström, R.; Dreiser, J.; Fritz, F.; Büchner, B.; Popov, A. A.; Piamonteze, C.; Greber, T., Gadolinium as an accelerator for reaching thermal equilibrium and its influence on the ground state of Dy<sub>2</sub>GdN@C<sub>80</sub> single-molecule magnets. *Phys. Rev. B* **2021**, *103* (1), 014404.
34. Zalibera, M.; Ziegs, F.; Schiemenz, S.; Dubrovin, V.; Lubitz, W.; Savitsky, A.; Deng, S.; Wang, X.-B.; Avdoshenko, S.; Popov, A. A., Metallofullerene photoswitches driven by photoinduced fullerene-to-metal electron transfer. *Chem. Sci.* **2021**, *12*, 7818-7838.
